# Supplementary material
Source: publisher figshare collection journal article supplement (https://acs.figshare.com/ndownloader/files/5338420)
Supplement: Supplementary file 1 [file 5338420]

data_General
_audit_creation_date                  '2006-12-18'
_audit_creation_method                'by CrystalStructure 3.8'
_audit_update_record                   ?

#==============================================================================

# PROCESSING SUMMARY (IUCr Office Use Only)

_journal_date_recd_electronic     ?
_journal_date_from_coeditor       ?
_journal_date_accepted            ?
_journal_coeditor_code            ?

#==============================================================================

# SUBMISSION DETAILS

_publ_contact_author_name             'ENTER NAME'
_publ_contact_author_email            'ENTER EMAIL ADDRESS'
_publ_contact_author_fax              'ENTER FAX NUMBER'
_publ_contact_author_phone            'ENTER PHONE NUMBER'
_publ_contact_letter
;
    ENTER TEXT OF LETTER
;
_publ_requested_journal               'ENTER JOURNAL NAME HERE'
_publ_requested_category              'CHOOSE FI FM FO CI CM CO or AD'
_publ_requested_coeditor_name          ?

#==============================================================================

# TITLE AND AUTHOR LIST

_publ_section_title
;
    ENTER SECTION TITLE
;
_publ_section_title_footnote
;
    ENTER FOOTNOTE TO TITLE OF PAPER
;
loop_
_publ_author_name
_publ_author_footnote
_publ_author_address
' FIRST AUTHORS NAME '
;
  FIRST AUTHORS FOOTNOTES
;
;
  FIRST AUTHORS ADDRESS
;
_publ_section_synopsis
;
  ENTER SYNOPSIS
;

#==============================================================================

# TEXT

_publ_section_abstract
;
    ENTER ABSTRACT
;
_publ_section_comment
;
    ENTER TEXT
;
_publ_section_references
;
    ENTER OTHER REFERENCES

    Rigaku/MSC and Rigaku Corporation. (2006).
    CrystalStructure (Version 3.8). 
    Single Crystal Structure Analysis Software.
    Rigaku/MSC, 9009 TX, USA 77381-5209.
    Rigaku, Tokyo 196-8666, Japan.

    Carruthers, J.R., Rollett,J.S., Betteridge, P.W.,
	 Kinna, D., Pearce, L., Larsen, A., and Gabe, E.(1999)
    CRYSTALS Issue 11, Chemical Crystallography Laboratory, Oxford, UK.

;
_publ_section_figure_captions
;
    ENTER FIGURE CAPTIONS
;
_publ_section_exptl_prep
;
    ENTER COMPOUND PREPARATION DETAILS
;
_publ_section_exptl_refinement
;
    ENTER SPECIAL DETAILS OF THE REFINEMENT
;

#==============================================================================

data__hashimoto

#==============================================================================

# CHEMICAL DATA

_chemical_formula_sum                  'C38 H43 B2 F8 N5 Pd6 '
_chemical_formula_moiety               'C38 H43 B2 F8 N5 Pd6 '
_chemical_formula_weight               1381.80
_chemical_melting_point                ?

#==============================================================================

# CRYSTAL DATA
_symmetry_cell_setting                 triclinic
_symmetry_space_group_name_H-M        'P -1'
_symmetry_space_group_name_Hall       '-P 1'
_symmetry_Int_Tables_number            2
loop_
_symmetry_equiv_pos_site_id
_symmetry_equiv_pos_as_xyz
1   '+X,+Y,+Z'
2   '-X,-Y,-Z'

#------------------------------------------------------------------------------

_cell_length_a                         11.4203(4)
_cell_length_b                         13.8401(6)
_cell_length_c                         14.3530(6)
_cell_angle_alpha                      83.7870(12)
_cell_angle_beta                       77.0220(13)
_cell_angle_gamma                      71.2870(14)
_cell_volume                           2092.18(14)
_cell_formula_units_Z                  2
_cell_measurement_reflns_used          19948
_cell_measurement_theta_min            3.0
_cell_measurement_theta_max            27.5
_cell_measurement_temperature          123.1

#------------------------------------------------------------------------------

_exptl_crystal_description            'block'
_exptl_crystal_colour                 'black'
_exptl_crystal_size_max                0.80
_exptl_crystal_size_mid                0.80
_exptl_crystal_size_min                0.60
_exptl_crystal_density_diffrn          2.193
_exptl_crystal_density_meas            ?
_exptl_crystal_density_method         'not measured'
_exptl_crystal_F_000                   1328.00
_exptl_absorpt_coefficient_mu          2.597
_exptl_absorpt_correction_type         none

#==============================================================================

# EXPERIMENTAL DATA

_diffrn_radiation_type                'Mo K\a'
_diffrn_radiation_wavelength           0.71075
_diffrn_measurement_device_type       'Rigaku RAXIS-RAPID'
_diffrn_measurement_method             \w
_diffrn_detector_area_resol_mean       10.00
_diffrn_reflns_number                  20643
_diffrn_reflns_av_R_equivalents        0.068
_diffrn_reflns_theta_max               27.46
_diffrn_measured_fraction_theta_max    0.993
_diffrn_reflns_theta_full              27.46
_diffrn_measured_fraction_theta_full   0.993
_diffrn_reflns_limit_h_min             -14
_diffrn_reflns_limit_h_max             14
_diffrn_reflns_limit_k_min             -17
_diffrn_reflns_limit_k_max             17
_diffrn_reflns_limit_l_min             -18
_diffrn_reflns_limit_l_max             18

#==============================================================================

# REFINEMENT DATA

_refine_special_details
;
    Refinement was performed using reflections with F^2^ > 2.0 sigma(F^2^).
    The weighted R-factor(wR), goodness of fit (S) and R-factor (gt) are 
    based on F, with F set to zero for negative F. The threshold expression of
    F^2^ > 2.0 sigma(F^2^) is used only for calculating R-factor (gt).
;
_reflns_number_total                   9494
_reflns_number_gt                      17922
_reflns_threshold_expression           F^2^>2.0\s(F^2^)
_refine_ls_structure_factor_coef       F
_refine_ls_R_factor_gt                 0.0720
_refine_ls_wR_factor_ref               0.0941
_refine_ls_hydrogen_treatment          refall
_refine_ls_number_reflns               17981
_refine_ls_number_parameters           575
_refine_ls_goodness_of_fit_ref         10.799
_refine_ls_weighting_scheme            unit
_refine_ls_weighting_details
'w = 1.0'
_refine_ls_shift/su_max                0.0000
_refine_diff_density_max               6.35
_refine_diff_density_min               -3.05
_refine_ls_extinction_method           none
_refine_ls_extinction_coef             ?

loop_
_atom_type_symbol
_atom_type_description
_atom_type_scat_dispersion_real
_atom_type_scat_dispersion_imag
_atom_type_scat_source
  'C' 'C'  0.003 0.002 
;
International Tables for Crystallography
(1992, Vol. C, Tables 4.2.6.8 and 6.1.1.4)
;
  'H' 'H'  0.000 0.000 
;
International Tables for Crystallography
(1992, Vol. C, Table 6.1.1.4)
;
  'Pd' 'Pd'  -0.999 1.007 
;
International Tables for Crystallography
(1992, Vol. C, Tables 4.2.6.8 and 6.1.1.4)
;
  'N' 'N'  0.006 0.003 
;
International Tables for Crystallography
(1992, Vol. C, Tables 4.2.6.8 and 6.1.1.4)
;
  'B' 'B'  0.001 0.001 
;
International Tables for Crystallography
(1992, Vol. C, Tables 4.2.6.8 and 6.1.1.4)
;
  'F' 'F'  0.017 0.010 
;
International Tables for Crystallography
(1992, Vol. C, Tables 4.2.6.8 and 6.1.1.4)
;

#==============================================================================

# ATOMIC COORDINATES AND THERMAL PARAMETERS

loop_
_atom_site_label
_atom_site_type_symbol
_atom_site_fract_x
_atom_site_fract_y
_atom_site_fract_z
_atom_site_U_iso_or_equiv
_atom_site_adp_type
_atom_site_occupancy
_atom_site_symmetry_multiplicity
_atom_site_calc_flag
_atom_site_refinement_flags
_atom_site_disorder_assembly
_atom_site_disorder_group
 Pd(1) Pd 0.13462(7) 0.18680(5) 0.10649(5) 0.01908(15) Uani 1.00 1 d . . .
 Pd(2) Pd 0.26873(6) 0.24814(5) -0.05424(5) 0.01792(15) Uani 1.00 1 d . . .
 Pd(3) Pd 0.30135(6) 0.29145(5) 0.12365(5) 0.01890(15) Uani 1.00 1 d . . .
 Pd(4) Pd 0.40668(7) 0.36604(5) 0.23823(5) 0.01910(16) Uani 1.00 1 d . . .
 Pd(5) Pd 0.39552(7) 0.53910(5) 0.33540(5) 0.01941(16) Uani 1.00 1 d . . .
 Pd(6) Pd 0.58482(7) 0.36634(5) 0.34339(5) 0.01898(16) Uani 1.00 1 d . . .
 F(1) F 0.0619(6) 0.8583(5) 0.1328(5) 0.048(2) Uani 1.00 1 d . . .
 F(2) F 0.2008(6) 0.8371(5) -0.0100(4) 0.0402(18) Uani 1.00 1 d . . .
 F(3) F 0.2725(6) 0.8043(4) 0.1295(4) 0.0361(17) Uani 1.00 1 d . . .
 F(4) F 0.1787(6) 0.7001(4) 0.0844(5) 0.045(2) Uani 1.00 1 d . . .
 F(5) F 0.6566(6) 0.0357(4) 0.4481(4) 0.0434(18) Uani 1.00 1 d . . .
 F(6) F 0.8577(7) 0.0199(5) 0.4597(5) 0.049(2) Uani 1.00 1 d . . .
 F(7) F 0.7296(6) -0.0396(5) 0.5812(4) 0.049(2) Uani 1.00 1 d . . .
 F(8) F 0.8066(7) -0.1207(5) 0.4415(5) 0.055(2) Uani 1.00 1 d . . .
 N(1) N -0.0119(8) 0.1148(6) 0.1715(6) 0.028(2) Uani 1.00 1 d . . .
 N(2) N 0.3262(8) 0.2253(6) -0.2117(5) 0.028(2) Uani 1.00 1 d . . .
 N(3) N 0.2808(9) 0.7004(6) 0.3642(6) 0.032(2) Uani 1.00 1 d . . .
 N(4) N 0.7660(8) 0.2802(6) 0.3850(6) 0.031(2) Uani 1.00 1 d . . .
 N(5) N 0.8769(11) 0.5435(9) 0.3305(7) 0.052(3) Uani 1.00 1 d . . .
 C(1) C 0.0020(8) 0.3245(6) 0.0541(6) 0.021(2) Uani 1.00 1 d . . .
 C(2) C 0.0627(8) 0.3497(6) -0.0373(6) 0.022(2) Uani 1.00 1 d . . .
 C(3) C 0.1508(8) 0.4065(6) -0.0627(6) 0.023(2) Uani 1.00 1 d . . .
 C(4) C 0.2056(8) 0.4413(6) -0.0007(7) 0.028(2) Uani 1.00 1 d . . .
 C(5) C 0.1791(9) 0.4419(7) 0.0997(7) 0.027(2) Uani 1.00 1 d . . .
 C(6) C 0.1013(9) 0.3940(7) 0.1640(6) 0.025(2) Uani 1.00 1 d . . .
 C(7) C 0.0183(8) 0.3435(6) 0.1448(6) 0.023(2) Uani 1.00 1 d . . .
 C(8) C 0.2868(9) 0.0479(6) 0.0493(7) 0.029(2) Uani 1.00 1 d . . .
 C(9) C 0.3602(9) 0.0838(6) -0.0297(6) 0.026(2) Uani 1.00 1 d . . .
 C(10) C 0.4462(8) 0.1381(6) -0.0350(6) 0.020(2) Uani 1.00 1 d . . .
 C(11) C 0.4839(9) 0.1716(7) 0.0437(7) 0.026(2) Uani 1.00 1 d . . .
 C(12) C 0.4442(9) 0.1519(6) 0.1432(6) 0.022(2) Uani 1.00 1 d . . .
 C(13) C 0.3525(9) 0.1058(7) 0.1876(6) 0.026(2) Uani 1.00 1 d . . .
 C(14) C 0.2853(9) 0.0546(6) 0.1467(6) 0.026(2) Uani 1.00 1 d . . .
 C(15) C 0.4808(9) 0.5924(7) 0.1944(6) 0.029(2) Uani 1.00 1 d . . .
 C(16) C 0.4343(9) 0.5411(8) 0.1399(6) 0.031(2) Uani 1.00 1 d . . .
 C(17) C 0.4887(9) 0.4353(8) 0.1092(6) 0.028(2) Uani 1.00 1 d . . .
 C(18) C 0.5906(10) 0.3614(7) 0.1362(6) 0.028(2) Uani 1.00 1 d . . .
 C(19) C 0.6755(8) 0.3715(6) 0.1905(6) 0.023(2) Uani 1.00 1 d . . .
 C(20) C 0.6734(9) 0.4584(7) 0.2363(6) 0.027(2) Uani 1.00 1 d . . .
 C(21) C 0.5812(10) 0.5557(7) 0.2424(6) 0.028(2) Uani 1.00 1 d . . .
 C(22) C 0.2540(9) 0.4821(7) 0.4327(6) 0.028(2) Uani 1.00 1 d . . .
 C(23) C 0.2254(9) 0.4159(8) 0.3779(6) 0.031(2) Uani 1.00 1 d . . .
 C(24) C 0.2866(9) 0.3156(7) 0.3579(6) 0.028(2) Uani 1.00 1 d . . .
 C(25) C 0.4030(10) 0.2528(7) 0.3784(6) 0.030(2) Uani 1.00 1 d . . .
 C(26) C 0.4772(9) 0.2748(7) 0.4365(7) 0.030(2) Uani 1.00 1 d . . .
 C(27) C 0.4584(9) 0.3654(7) 0.4811(6) 0.025(2) Uani 1.00 1 d . . .
 C(28) C 0.3555(10) 0.4620(7) 0.4791(6) 0.029(2) Uani 1.00 1 d . . .
 C(29) C -0.0878(9) 0.0779(7) 0.1859(7) 0.029(2) Uani 1.00 1 d . . .
 C(30) C -0.1895(11) 0.0288(9) 0.2049(9) 0.044(3) Uani 1.00 1 d . . .
 C(31) C 0.3785(9) 0.1784(7) -0.2781(6) 0.025(2) Uani 1.00 1 d . . .
 C(32) C 0.4461(13) 0.1158(9) -0.3584(8) 0.045(3) Uani 1.00 1 d . . .
 C(33) C 0.2155(9) 0.7815(7) 0.3556(6) 0.026(2) Uani 1.00 1 d . . .
 C(34) C 0.1320(11) 0.8835(7) 0.3419(7) 0.036(2) Uani 1.00 1 d . . .
 C(35) C 0.8678(9) 0.2408(7) 0.3913(6) 0.027(2) Uani 1.00 1 d . . .
 C(36) C 0.9962(10) 0.1883(8) 0.3990(7) 0.037(2) Uani 1.00 1 d . . .
 C(37) C 0.9158(10) 0.6101(9) 0.3195(7) 0.040(3) Uani 1.00 1 d . . .
 C(38) C 0.9712(14) 0.6944(10) 0.3039(10) 0.057(4) Uani 1.00 1 d . . .
 B(1) B 0.1756(11) 0.8007(8) 0.0840(7) 0.027(2) Uani 1.00 1 d . . .
 B(2) B 0.7623(11) -0.0257(9) 0.4817(8) 0.031(2) Uani 1.00 1 d . . .
 H(1) H -0.0586 0.2905 0.0553 0.027 Uiso 1.00 1 c R . .
 H(2) H 0.0430 0.3253 -0.0894 0.026 Uiso 1.00 1 c R . .
 H(3) H 0.1745 0.4224 -0.1289 0.025 Uiso 1.00 1 c R . .
 H(4) H 0.2711 0.4692 -0.0314 0.030 Uiso 1.00 1 c R . .
 H(5) H 0.2189 0.4791 0.1272 0.034 Uiso 1.00 1 c R . .
 H(6) H 0.1037 0.3954 0.2295 0.029 Uiso 1.00 1 c R . .
 H(7) H -0.0313 0.3196 0.1991 0.026 Uiso 1.00 1 c R . .
 H(8) H 0.2313 0.0153 0.0355 0.036 Uiso 1.00 1 c R . .
 H(9) H 0.3501 0.0688 -0.0898 0.032 Uiso 1.00 1 c R . .
 H(10) H 0.4845 0.1555 -0.0977 0.021 Uiso 1.00 1 c R . .
 H(11) H 0.5413 0.2104 0.0267 0.032 Uiso 1.00 1 c R . .
 H(12) H 0.4853 0.1724 0.1846 0.027 Uiso 1.00 1 c R . .
 H(13) H 0.3307 0.1090 0.2553 0.030 Uiso 1.00 1 c R . .
 H(14) H 0.2340 0.0210 0.1908 0.029 Uiso 1.00 1 c R . .
 H(15) H 0.4376 0.6634 0.1998 0.031 Uiso 1.00 1 c R . .
 H(16) H 0.3581 0.5794 0.1201 0.035 Uiso 1.00 1 c R . .
 H(17) H 0.4491 0.4155 0.0662 0.037 Uiso 1.00 1 c R . .
 H(18) H 0.6060 0.2947 0.1155 0.033 Uiso 1.00 1 c R . .
 H(19) H 0.7435 0.3115 0.1972 0.027 Uiso 1.00 1 c R . .
 H(20) H 0.7423 0.4502 0.2663 0.036 Uiso 1.00 1 c R . .
 H(21) H 0.5883 0.6014 0.2842 0.034 Uiso 1.00 1 c R . .
 H(22) H 0.1965 0.5493 0.4387 0.032 Uiso 1.00 1 c R . .
 H(23) H 0.1527 0.4459 0.3507 0.039 Uiso 1.00 1 c R . .
 H(24) H 0.2450 0.2837 0.3263 0.036 Uiso 1.00 1 c R . .
 H(25) H 0.4365 0.1882 0.3499 0.039 Uiso 1.00 1 c R . .
 H(26) H 0.5493 0.2201 0.4467 0.034 Uiso 1.00 1 c R . .
 H(27) H 0.5196 0.3644 0.5167 0.033 Uiso 1.00 1 c R . .
 H(28) H 0.3583 0.5162 0.5131 0.037 Uiso 1.00 1 c R . .
 H(29) H -0.1548 -0.0412 0.1897 0.057 Uiso 1.00 1 c R . .
 H(30) H -0.2297 0.0341 0.2705 0.057 Uiso 1.00 1 c R . .
 H(31) H -0.2496 0.0626 0.1664 0.057 Uiso 1.00 1 c R . .
 H(32) H 0.4478 0.0471 -0.3417 0.053 Uiso 1.00 1 c R . .
 H(33) H 0.4051 0.1395 -0.4110 0.053 Uiso 1.00 1 c R . .
 H(34) H 0.5300 0.1193 -0.3757 0.053 Uiso 1.00 1 c R . .
 H(35) H 0.0886 0.9107 0.4025 0.041 Uiso 1.00 1 c R . .
 H(36) H 0.0726 0.8808 0.3061 0.041 Uiso 1.00 1 c R . .
 H(37) H 0.1800 0.9258 0.3084 0.041 Uiso 1.00 1 c R . .
 H(38) H 0.9985 0.1570 0.4611 0.043 Uiso 1.00 1 c R . .
 H(39) H 1.0330 0.1376 0.3524 0.043 Uiso 1.00 1 c R . .
 H(40) H 1.0424 0.2361 0.3885 0.043 Uiso 1.00 1 c R . .
 H(41) H 1.0191 0.6902 0.3512 0.070 Uiso 1.00 1 c R . .
 H(42) H 1.0245 0.6898 0.2423 0.070 Uiso 1.00 1 c R . .
 H(43) H 0.9055 0.7576 0.3076 0.070 Uiso 1.00 1 c R . .


loop_
_atom_site_aniso_label
_atom_site_aniso_U_11
_atom_site_aniso_U_22
_atom_site_aniso_U_33
_atom_site_aniso_U_12
_atom_site_aniso_U_13
_atom_site_aniso_U_23
 Pd(1) 0.0187(3) 0.0183(3) 0.0207(3) -0.0074(2) -0.0043(2) 0.0033(2)
 Pd(2) 0.0196(3) 0.0171(3) 0.0154(3) -0.0038(2) -0.0040(2) 0.0014(2)
 Pd(3) 0.0181(3) 0.0176(3) 0.0220(3) -0.0037(2) -0.0083(2) -0.0013(2)
 Pd(4) 0.0218(3) 0.0249(3) 0.0144(3) -0.0127(2) -0.0049(2) 0.0027(2)
 Pd(5) 0.0226(3) 0.0186(3) 0.0170(3) -0.0066(2) -0.0048(2) 0.0023(2)
 Pd(6) 0.0196(3) 0.0215(3) 0.0172(3) -0.0075(2) -0.0071(2) 0.0044(2)
 F(1) 0.038(3) 0.053(4) 0.045(4) -0.006(3) -0.000(3) -0.006(3)
 F(2) 0.041(3) 0.056(4) 0.025(3) -0.016(3) -0.011(2) 0.007(2)
 F(3) 0.043(3) 0.040(3) 0.033(3) -0.020(3) -0.017(2) 0.008(2)
 F(4) 0.049(4) 0.027(3) 0.069(4) -0.016(3) -0.032(3) 0.006(3)
 F(5) 0.044(4) 0.037(3) 0.043(3) 0.001(3) -0.018(3) -0.001(2)
 F(6) 0.047(4) 0.049(4) 0.053(4) -0.023(3) -0.005(3) 0.008(3)
 F(7) 0.044(4) 0.072(4) 0.027(3) -0.019(3) -0.005(2) 0.015(3)
 F(8) 0.056(4) 0.035(3) 0.072(5) -0.000(3) -0.023(4) -0.013(3)
 N(1) 0.025(4) 0.028(4) 0.034(4) -0.013(3) -0.008(3) 0.005(3)
 N(2) 0.032(4) 0.025(3) 0.023(4) -0.001(3) -0.005(3) 0.001(3)
 N(3) 0.043(5) 0.029(4) 0.026(4) -0.014(4) -0.007(3) 0.004(3)
 N(4) 0.028(4) 0.032(4) 0.027(4) -0.002(3) -0.008(3) 0.005(3)
 N(5) 0.053(7) 0.069(7) 0.045(6) -0.037(6) -0.001(5) -0.014(5)
 C(1) 0.022(4) 0.018(3) 0.028(4) -0.007(3) -0.011(3) 0.001(3)
 C(2) 0.020(4) 0.019(3) 0.027(4) 0.002(3) -0.011(3) -0.006(3)
 C(3) 0.024(4) 0.019(4) 0.019(4) -0.002(3) -0.001(3) 0.006(3)
 C(4) 0.016(4) 0.009(3) 0.049(6) 0.002(3) -0.002(4) 0.006(3)
 C(5) 0.031(5) 0.022(4) 0.032(5) -0.006(3) -0.016(4) -0.000(3)
 C(6) 0.029(5) 0.028(4) 0.015(4) -0.002(3) -0.009(3) -0.003(3)
 C(7) 0.019(4) 0.026(4) 0.021(4) -0.005(3) -0.003(3) 0.004(3)
 C(8) 0.028(5) 0.018(4) 0.043(5) -0.009(3) -0.011(4) 0.004(3)
 C(9) 0.032(5) 0.024(4) 0.023(4) -0.006(4) -0.012(3) 0.001(3)
 C(10) 0.017(4) 0.019(3) 0.018(4) 0.002(3) -0.002(3) 0.000(3)
 C(11) 0.023(4) 0.025(4) 0.032(5) -0.010(3) -0.008(3) 0.007(3)
 C(12) 0.025(4) 0.020(4) 0.024(4) -0.002(3) -0.014(3) 0.000(3)
 C(13) 0.030(5) 0.026(4) 0.019(4) -0.002(3) -0.009(3) 0.007(3)
 C(14) 0.023(4) 0.024(4) 0.025(4) -0.004(3) -0.004(3) 0.013(3)
 C(15) 0.030(5) 0.020(4) 0.027(4) -0.002(3) 0.002(3) 0.005(3)
 C(16) 0.025(5) 0.041(5) 0.021(4) -0.009(4) -0.005(3) 0.017(4)
 C(17) 0.027(5) 0.050(5) 0.015(4) -0.024(4) -0.006(3) 0.010(3)
 C(18) 0.043(6) 0.026(4) 0.015(4) -0.017(4) 0.003(3) -0.001(3)
 C(19) 0.021(4) 0.023(4) 0.024(4) -0.010(3) -0.003(3) 0.006(3)
 C(20) 0.028(5) 0.038(5) 0.023(4) -0.021(4) -0.008(3) 0.011(3)
 C(21) 0.041(5) 0.022(4) 0.021(4) -0.015(4) -0.000(4) 0.002(3)
 C(22) 0.020(4) 0.033(5) 0.028(5) -0.008(4) 0.000(3) 0.005(3)
 C(23) 0.027(5) 0.046(5) 0.024(4) -0.021(4) -0.008(3) 0.012(4)
 C(24) 0.029(5) 0.041(5) 0.020(4) -0.022(4) -0.003(3) -0.003(3)
 C(25) 0.043(6) 0.027(4) 0.026(4) -0.025(4) -0.002(4) 0.005(3)
 C(26) 0.025(5) 0.030(4) 0.032(5) -0.009(4) -0.008(4) 0.017(4)
 C(27) 0.024(4) 0.034(4) 0.024(4) -0.015(4) -0.013(3) 0.005(3)
 C(28) 0.048(6) 0.030(4) 0.015(4) -0.024(4) -0.005(4) 0.003(3)
 C(29) 0.025(5) 0.025(4) 0.032(5) -0.006(4) -0.007(4) 0.011(3)
 C(30) 0.034(6) 0.055(7) 0.053(7) -0.031(5) -0.010(5) 0.017(5)
 C(31) 0.026(4) 0.024(4) 0.025(4) -0.007(3) -0.009(3) 0.009(3)
 C(32) 0.056(8) 0.050(6) 0.027(5) -0.014(6) -0.006(5) -0.004(5)
 C(33) 0.031(5) 0.027(4) 0.017(4) -0.009(4) -0.002(3) -0.001(3)
 C(34) 0.041(6) 0.029(5) 0.032(5) -0.006(4) -0.005(4) 0.000(4)
 C(35) 0.029(5) 0.031(4) 0.022(4) -0.013(4) -0.008(3) 0.006(3)
 C(36) 0.029(5) 0.046(6) 0.033(5) -0.004(4) -0.015(4) 0.005(4)
 C(37) 0.029(5) 0.056(7) 0.027(5) -0.001(5) -0.005(4) -0.013(5)
 C(38) 0.065(9) 0.055(8) 0.054(8) -0.018(7) -0.014(7) -0.013(6)
 B(1) 0.029(5) 0.026(5) 0.025(5) -0.007(4) -0.010(4) -0.001(4)
 B(2) 0.025(5) 0.033(5) 0.033(6) -0.002(4) -0.008(4) -0.003(4)

#==============================================================================

_computing_data_collection            'PROCESS-AUTO'
_computing_cell_refinement            'PROCESS-AUTO'
_computing_data_reduction             'CrystalStructure'
_computing_structure_solution         'DIRDIF99 (PATTY)'
_computing_structure_refinement       'CRYSTALS'
_computing_publication_material       'CrystalStructure 3.8'
_computing_molecular_graphics          ?

#==============================================================================

# MOLECULAR GEOMETRY

_geom_special_details
;
    ENTER SPECIAL DETAILS OF THE MOLECULAR GEOMETRY
;

loop_
_geom_bond_atom_site_label_1
_geom_bond_atom_site_label_2
_geom_bond_distance
_geom_bond_publ_flag
_geom_bond_site_symmetry_1
_geom_bond_site_symmetry_2
Pd(1) Pd(2) 2.6855(9) yes . .
Pd(1) Pd(3) 2.8003(12) yes . .
Pd(1) N(1) 2.199(9) yes . .
Pd(1) C(1) 2.201(8) yes . .
Pd(1) C(7) 2.202(8) yes . .
Pd(1) C(8) 2.224(8) yes . .
Pd(1) C(14) 2.200(8) yes . .
Pd(2) Pd(3) 2.8141(11) yes . .
Pd(2) N(2) 2.235(8) yes . .
Pd(2) C(2) 2.294(8) yes . .
Pd(2) C(3) 2.180(7) yes . .
Pd(2) C(9) 2.203(8) yes . .
Pd(2) C(10) 2.164(8) yes . .
Pd(3) Pd(4) 2.6963(12) yes . .
Pd(3) C(5) 2.144(8) yes . .
Pd(3) C(6) 2.253(8) yes . .
Pd(3) C(11) 2.352(8) yes . .
Pd(3) C(12) 2.131(8) yes . .
Pd(4) Pd(5) 2.8540(11) yes . .
Pd(4) Pd(6) 2.7934(12) yes . .
Pd(4) C(17) 2.154(9) yes . .
Pd(4) C(18) 2.261(10) yes . .
Pd(4) C(24) 2.148(9) yes . .
Pd(4) C(25) 2.414(9) yes . .
Pd(5) Pd(6) 2.6719(8) yes . .
Pd(5) N(3) 2.225(8) yes . .
Pd(5) C(15) 2.201(9) yes . .
Pd(5) C(21) 2.303(10) yes . .
Pd(5) C(22) 2.179(10) yes . .
Pd(5) C(28) 2.239(9) yes . .
Pd(6) N(4) 2.209(8) yes . .
Pd(6) C(19) 2.211(8) yes . .
Pd(6) C(20) 2.171(10) yes . .
Pd(6) C(26) 2.191(10) yes . .
Pd(6) C(27) 2.171(8) yes . .
F(1) B(1) 1.364(11) yes . .
F(2) B(1) 1.389(12) yes . .
F(3) B(1) 1.422(16) yes . .
F(4) B(1) 1.380(13) yes . .
F(5) B(2) 1.388(13) yes . .
F(6) B(2) 1.390(16) yes . .
F(7) B(2) 1.400(13) yes . .
F(8) B(2) 1.386(14) yes . .
N(1) C(29) 1.111(15) yes . .
N(2) C(31) 1.146(11) yes . .
N(3) C(33) 1.144(11) yes . .
N(4) C(35) 1.134(13) yes . .
N(5) C(37) 1.13(2) yes . .
C(1) C(2) 1.404(12) yes . .
C(1) C(7) 1.419(14) yes . .
C(2) C(3) 1.429(14) yes . .
C(3) C(4) 1.397(16) yes . .
C(4) C(5) 1.405(14) yes . .
C(5) C(6) 1.399(14) yes . .
C(6) C(7) 1.430(16) yes . .
C(8) C(9) 1.398(13) yes . .
C(8) C(14) 1.407(15) yes . .
C(9) C(10) 1.400(16) yes . .
C(10) C(11) 1.462(15) yes . .
C(11) C(12) 1.423(12) yes . .
C(12) C(13) 1.397(15) yes . .
C(13) C(14) 1.442(17) yes . .
C(15) C(16) 1.396(17) yes . .
C(15) C(21) 1.397(15) yes . .
C(16) C(17) 1.469(14) yes . .
C(17) C(18) 1.380(13) yes . .
C(18) C(19) 1.421(16) yes . .
C(19) C(20) 1.423(15) yes . .
C(20) C(21) 1.416(12) yes . .
C(22) C(23) 1.425(17) yes . .
C(22) C(28) 1.402(16) yes . .
C(23) C(24) 1.368(14) yes . .
C(24) C(25) 1.410(14) yes . .
C(25) C(26) 1.430(18) yes . .
C(26) C(27) 1.403(15) yes . .
C(27) C(28) 1.473(12) yes . .
C(29) C(30) 1.486(18) yes . .
C(31) C(32) 1.436(14) yes . .
C(33) C(34) 1.449(12) yes . .
C(35) C(36) 1.436(14) yes . .
C(37) C(38) 1.47(2) yes . .
C(1) H(1) 0.950(15) no . .
C(2) H(2) 0.950(15) no . .
C(3) H(3) 0.950(12) no . .
C(4) H(4) 0.950(14) no . .
C(5) H(5) 0.950(17) no . .
C(6) H(6) 0.950(13) no . .
C(7) H(7) 0.950(12) no . .
C(8) H(8) 0.950(17) no . .
C(9) H(9) 0.950(15) no . .
C(10) H(10) 0.950(11) no . .
C(11) H(11) 0.950(16) no . .
C(12) H(12) 0.950(16) no . .
C(13) H(13) 0.950(13) no . .
C(14) H(14) 0.950(13) no . .
C(15) H(15) 0.950 no . .
C(16) H(16) 0.950 no . .
C(17) H(17) 0.950 no . .
C(18) H(18) 0.950 no . .
C(19) H(19) 0.950 no . .
C(20) H(20) 0.950 no . .
C(21) H(21) 0.950 no . .
C(22) H(22) 0.950 no . .
C(23) H(23) 0.950 no . .
C(24) H(24) 0.950 no . .
C(25) H(25) 0.950 no . .
C(26) H(26) 0.950 no . .
C(27) H(27) 0.950 no . .
C(28) H(28) 0.950 no . .
C(30) H(29) 0.950(17) no . .
C(30) H(30) 0.950(17) no . .
C(30) H(31) 0.950(18) no . .
C(32) H(32) 0.950(19) no . .
C(32) H(33) 0.950(18) no . .
C(32) H(34) 0.95(2) no . .
C(34) H(35) 0.950(14) no . .
C(34) H(36) 0.950(19) no . .
C(34) H(37) 0.950(17) no . .
C(36) H(38) 0.950(15) no . .
C(36) H(39) 0.950(16) no . .
C(36) H(40) 0.950(19) no . .
C(38) H(41) 0.95(2) no . .
C(38) H(42) 0.950(19) no . .
C(38) H(43) 0.950(18) no . .

loop_
_geom_angle_atom_site_label_1
_geom_angle_atom_site_label_2
_geom_angle_atom_site_label_3
_geom_angle
_geom_angle_publ_flag
_geom_angle_site_symmetry_1
_geom_angle_site_symmetry_2
_geom_angle_site_symmetry_3
Pd(2) Pd(1) Pd(3) 61.68(2) yes . . .
Pd(2) Pd(1) N(1) 147.6(2) yes . . .
Pd(2) Pd(1) C(1) 74.9(2) yes . . .
Pd(2) Pd(1) C(7) 93.6(2) yes . . .
Pd(2) Pd(1) C(8) 73.7(2) yes . . .
Pd(2) Pd(1) C(14) 98.4(2) yes . . .
Pd(3) Pd(1) N(1) 150.6(2) yes . . .
Pd(3) Pd(1) C(1) 93.0(2) yes . . .
Pd(3) Pd(1) C(7) 73.4(2) yes . . .
Pd(3) Pd(1) C(8) 94.4(3) yes . . .
Pd(3) Pd(1) C(14) 82.2(3) yes . . .
N(1) Pd(1) C(1) 94.3(3) yes . . .
N(1) Pd(1) C(7) 95.8(3) yes . . .
N(1) Pd(1) C(8) 98.4(3) yes . . .
N(1) Pd(1) C(14) 92.2(3) yes . . .
C(1) Pd(1) C(7) 37.6(3) yes . . .
C(1) Pd(1) C(8) 139.3(3) yes . . .
C(1) Pd(1) C(14) 173.1(3) yes . . .
C(7) Pd(1) C(8) 165.8(3) yes . . .
C(7) Pd(1) C(14) 143.5(3) yes . . .
C(8) Pd(1) C(14) 37.1(3) yes . . .
Pd(1) Pd(2) Pd(3) 61.17(2) yes . . .
Pd(1) Pd(2) N(2) 142.0(2) yes . . .
Pd(1) Pd(2) C(2) 71.6(2) yes . . .
Pd(1) Pd(2) C(3) 98.7(2) yes . . .
Pd(1) Pd(2) C(9) 72.3(2) yes . . .
Pd(1) Pd(2) C(10) 94.2(2) yes . . .
Pd(3) Pd(2) N(2) 154.5(2) yes . . .
Pd(3) Pd(2) C(2) 95.5(2) yes . . .
Pd(3) Pd(2) C(3) 87.0(2) yes . . .
Pd(3) Pd(2) C(9) 91.1(2) yes . . .
Pd(3) Pd(2) C(10) 75.4(2) yes . . .
N(2) Pd(2) C(2) 102.7(3) yes . . .
N(2) Pd(2) C(3) 96.7(3) yes . . .
N(2) Pd(2) C(9) 89.0(3) yes . . .
N(2) Pd(2) C(10) 89.6(3) yes . . .
C(2) Pd(2) C(3) 37.1(3) yes . . .
C(2) Pd(2) C(9) 134.1(3) yes . . .
C(2) Pd(2) C(10) 165.7(3) yes . . .
C(3) Pd(2) C(9) 170.5(3) yes . . .
C(3) Pd(2) C(10) 149.6(4) yes . . .
C(9) Pd(2) C(10) 37.4(4) yes . . .
Pd(1) Pd(3) Pd(2) 57.15(2) yes . . .
Pd(1) Pd(3) Pd(4) 148.47(3) yes . . .
Pd(1) Pd(3) C(5) 96.4(3) yes . . .
Pd(1) Pd(3) C(6) 70.6(2) yes . . .
Pd(1) Pd(3) C(11) 95.6(2) yes . . .
Pd(1) Pd(3) C(12) 91.5(3) yes . . .
Pd(2) Pd(3) Pd(4) 154.35(3) yes . . .
Pd(2) Pd(3) C(5) 85.8(3) yes . . .
Pd(2) Pd(3) C(6) 93.4(2) yes . . .
Pd(2) Pd(3) C(11) 68.9(2) yes . . .
Pd(2) Pd(3) C(12) 96.6(2) yes . . .
Pd(4) Pd(3) C(5) 90.3(3) yes . . .
Pd(4) Pd(3) C(6) 98.6(2) yes . . .
Pd(4) Pd(3) C(11) 99.1(2) yes . . .
Pd(4) Pd(3) C(12) 84.1(3) yes . . .
C(5) Pd(3) C(6) 37.0(3) yes . . .
C(5) Pd(3) C(11) 139.4(3) yes . . .
C(5) Pd(3) C(12) 171.7(4) yes . . .
C(6) Pd(3) C(11) 161.9(4) yes . . .
C(6) Pd(3) C(12) 150.1(3) yes . . .
C(11) Pd(3) C(12) 36.6(3) yes . . .
Pd(3) Pd(4) Pd(5) 146.36(3) yes . . .
Pd(3) Pd(4) Pd(6) 157.09(3) yes . . .
Pd(3) Pd(4) C(17) 85.7(3) yes . . .
Pd(3) Pd(4) C(18) 98.8(2) yes . . .
Pd(3) Pd(4) C(24) 87.6(3) yes . . .
Pd(3) Pd(4) C(25) 103.3(3) yes . . .
Pd(5) Pd(4) Pd(6) 56.46(2) yes . . .
Pd(5) Pd(4) C(17) 87.3(3) yes . . .
Pd(5) Pd(4) C(18) 94.8(2) yes . . .
Pd(5) Pd(4) C(24) 92.5(3) yes . . .
Pd(5) Pd(4) C(25) 95.8(2) yes . . .
Pd(6) Pd(4) C(17) 96.0(3) yes . . .
Pd(6) Pd(4) C(18) 71.0(2) yes . . .
Pd(6) Pd(4) C(24) 94.3(3) yes . . .
Pd(6) Pd(4) C(25) 67.6(3) yes . . .
C(17) Pd(4) C(18) 36.3(3) yes . . .
C(17) Pd(4) C(24) 167.5(3) yes . . .
C(17) Pd(4) C(25) 157.0(3) yes . . .
C(18) Pd(4) C(24) 155.9(3) yes . . .
C(18) Pd(4) C(25) 120.7(3) yes . . .
C(24) Pd(4) C(25) 35.4(3) yes . . .
Pd(4) Pd(5) Pd(6) 60.62(2) yes . . .
Pd(4) Pd(5) N(3) 142.2(2) yes . . .
Pd(4) Pd(5) C(15) 85.3(2) yes . . .
Pd(4) Pd(5) C(21) 93.8(2) yes . . .
Pd(4) Pd(5) C(22) 78.4(2) yes . . .
Pd(4) Pd(5) C(28) 92.2(2) yes . . .
Pd(6) Pd(5) N(3) 157.2(2) yes . . .
Pd(6) Pd(5) C(15) 95.4(2) yes . . .
Pd(6) Pd(5) C(21) 69.4(2) yes . . .
Pd(6) Pd(5) C(22) 94.8(2) yes . . .
Pd(6) Pd(5) C(28) 72.0(2) yes . . .
N(3) Pd(5) C(15) 88.2(3) yes . . .
N(3) Pd(5) C(21) 102.6(3) yes . . .
N(3) Pd(5) C(22) 91.8(3) yes . . .
N(3) Pd(5) C(28) 101.7(3) yes . . .
C(15) Pd(5) C(21) 36.1(3) yes . . .
C(15) Pd(5) C(22) 153.4(4) yes . . .
C(15) Pd(5) C(28) 166.5(3) yes . . .
C(21) Pd(5) C(22) 164.2(3) yes . . .
C(21) Pd(5) C(28) 131.3(3) yes . . .
C(22) Pd(5) C(28) 37.0(4) yes . . .
Pd(4) Pd(6) Pd(5) 62.92(2) yes . . .
Pd(4) Pd(6) N(4) 145.9(2) yes . . .
Pd(4) Pd(6) C(19) 73.1(2) yes . . .
Pd(4) Pd(6) C(20) 94.0(3) yes . . .
Pd(4) Pd(6) C(26) 77.5(3) yes . . .
Pd(4) Pd(6) C(27) 94.2(3) yes . . .
Pd(5) Pd(6) N(4) 150.8(2) yes . . .
Pd(5) Pd(6) C(19) 95.9(2) yes . . .
Pd(5) Pd(6) C(20) 77.7(2) yes . . .
Pd(5) Pd(6) C(26) 98.3(2) yes . . .
Pd(5) Pd(6) C(27) 76.5(2) yes . . .
N(4) Pd(6) C(19) 92.3(3) yes . . .
N(4) Pd(6) C(20) 92.2(3) yes . . .
N(4) Pd(6) C(26) 94.8(3) yes . . .
N(4) Pd(6) C(27) 99.3(3) yes . . .
C(19) Pd(6) C(20) 37.9(3) yes . . .
C(19) Pd(6) C(26) 136.6(4) yes . . .
C(19) Pd(6) C(27) 167.2(4) yes . . .
C(20) Pd(6) C(26) 171.5(4) yes . . .
C(20) Pd(6) C(27) 145.5(3) yes . . .
C(26) Pd(6) C(27) 37.5(3) yes . . .
Pd(1) N(1) C(29) 166.0(8) yes . . .
Pd(2) N(2) C(31) 153.9(7) yes . . .
Pd(5) N(3) C(33) 161.6(9) yes . . .
Pd(6) N(4) C(35) 168.4(7) yes . . .
Pd(1) C(1) C(2) 106.6(5) yes . . .
Pd(1) C(1) C(7) 71.3(4) yes . . .
C(2) C(1) C(7) 128.8(10) yes . . .
Pd(2) C(2) C(1) 105.7(5) yes . . .
Pd(2) C(2) C(3) 67.1(4) yes . . .
C(1) C(2) C(3) 128.8(9) yes . . .
Pd(2) C(3) C(2) 75.8(4) yes . . .
Pd(2) C(3) C(4) 94.8(5) yes . . .
C(2) C(3) C(4) 127.1(8) yes . . .
C(3) C(4) C(5) 130.3(9) yes . . .
Pd(3) C(5) C(4) 97.0(5) yes . . .
Pd(3) C(5) C(6) 75.7(5) yes . . .
C(4) C(5) C(6) 127.7(11) yes . . .
Pd(3) C(6) C(5) 67.3(4) yes . . .
Pd(3) C(6) C(7) 108.6(5) yes . . .
C(5) C(6) C(7) 129.1(9) yes . . .
Pd(1) C(7) C(1) 71.1(4) yes . . .
Pd(1) C(7) C(6) 106.8(5) yes . . .
C(1) C(7) C(6) 127.4(8) yes . . .
Pd(1) C(8) C(9) 104.7(5) yes . . .
Pd(1) C(8) C(14) 70.5(4) yes . . .
C(9) C(8) C(14) 127.6(11) yes . . .
Pd(2) C(9) C(8) 108.9(5) yes . . .
Pd(2) C(9) C(10) 69.8(4) yes . . .
C(8) C(9) C(10) 130.9(10) yes . . .
Pd(2) C(10) C(9) 72.8(5) yes . . .
Pd(2) C(10) C(11) 107.2(5) yes . . .
C(9) C(10) C(11) 128.1(8) yes . . .
Pd(3) C(11) C(10) 105.7(6) yes . . .
Pd(3) C(11) C(12) 63.2(4) yes . . .
C(10) C(11) C(12) 126.9(10) yes . . .
Pd(3) C(12) C(11) 80.2(5) yes . . .
Pd(3) C(12) C(13) 90.6(5) yes . . .
C(11) C(12) C(13) 128.1(10) yes . . .
C(12) C(13) C(14) 130.1(8) yes . . .
Pd(1) C(14) C(8) 72.4(5) yes . . .
Pd(1) C(14) C(13) 100.1(5) yes . . .
C(8) C(14) C(13) 127.8(9) yes . . .
Pd(5) C(15) C(16) 96.6(6) yes . . .
Pd(5) C(15) C(21) 76.0(5) yes . . .
C(16) C(15) C(21) 130.1(8) yes . . .
C(15) C(16) C(17) 128.1(9) yes . . .
Pd(4) C(17) C(16) 96.5(5) yes . . .
Pd(4) C(17) C(18) 76.1(5) yes . . .
C(16) C(17) C(18) 127.2(10) yes . . .
Pd(4) C(18) C(17) 67.6(5) yes . . .
Pd(4) C(18) C(19) 107.8(5) yes . . .
C(17) C(18) C(19) 128.9(9) yes . . .
Pd(6) C(19) C(18) 107.6(6) yes . . .
Pd(6) C(19) C(20) 69.5(5) yes . . .
C(18) C(19) C(20) 129.3(8) yes . . .
Pd(6) C(20) C(19) 72.6(5) yes . . .
Pd(6) C(20) C(21) 103.1(6) yes . . .
C(19) C(20) C(21) 127.9(10) yes . . .
Pd(5) C(21) C(15) 68.0(5) yes . . .
Pd(5) C(21) C(20) 108.5(7) yes . . .
C(15) C(21) C(20) 127.7(10) yes . . .
Pd(5) C(22) C(23) 105.4(6) yes . . .
Pd(5) C(22) C(28) 73.8(6) yes . . .
C(23) C(22) C(28) 129.0(8) yes . . .
C(22) C(23) C(24) 130.0(10) yes . . .
Pd(4) C(24) C(23) 88.2(6) yes . . .
Pd(4) C(24) C(25) 82.6(6) yes . . .
C(23) C(24) C(25) 128.8(11) yes . . .
Pd(4) C(25) C(24) 61.9(5) yes . . .
Pd(4) C(25) C(26) 107.5(7) yes . . .
C(24) C(25) C(26) 127.8(9) yes . . .
Pd(6) C(26) C(25) 105.2(6) yes . . .
Pd(6) C(26) C(27) 70.5(5) yes . . .
C(25) C(26) C(27) 129.3(8) yes . . .
Pd(6) C(27) C(26) 72.0(5) yes . . .
Pd(6) C(27) C(28) 104.2(5) yes . . .
C(26) C(27) C(28) 127.9(10) yes . . .
Pd(5) C(28) C(22) 69.2(5) yes . . .
Pd(5) C(28) C(27) 107.3(5) yes . . .
C(22) C(28) C(27) 126.8(10) yes . . .
N(1) C(29) C(30) 179.8(11) yes . . .
N(2) C(31) C(32) 177.5(10) yes . . .
N(3) C(33) C(34) 178.2(12) yes . . .
N(4) C(35) C(36) 178.5(13) yes . . .
N(5) C(37) C(38) 177.9(11) yes . . .
F(1) B(1) F(2) 111.5(8) yes . . .
F(1) B(1) F(3) 109.1(9) yes . . .
F(1) B(1) F(4) 110.7(9) yes . . .
F(2) B(1) F(3) 108.3(9) yes . . .
F(2) B(1) F(4) 109.1(9) yes . . .
F(3) B(1) F(4) 108.2(8) yes . . .
F(5) B(2) F(6) 110.2(9) yes . . .
F(5) B(2) F(7) 109.1(8) yes . . .
F(5) B(2) F(8) 110.9(11) yes . . .
F(6) B(2) F(7) 109.3(11) yes . . .
F(6) B(2) F(8) 108.9(8) yes . . .
F(7) B(2) F(8) 108.5(9) yes . . .
Pd(1) C(1) H(1) 92.6(7) no . . .
C(2) C(1) H(1) 115.5(11) no . . .
C(7) C(1) H(1) 115.6(10) no . . .
Pd(2) C(2) H(2) 97.5(7) no . . .
C(1) C(2) H(2) 115.6(11) no . . .
C(3) C(2) H(2) 115.5(10) no . . .
Pd(2) C(3) H(3) 100.6(7) no . . .
C(2) C(3) H(3) 116.4(12) no . . .
C(4) C(3) H(3) 116.4(12) no . . .
C(3) C(4) H(4) 114.9(12) no . . .
C(5) C(4) H(4) 114.9(13) no . . .
Pd(3) C(5) H(5) 98.1(8) no . . .
C(4) C(5) H(5) 116.1(11) no . . .
C(6) C(5) H(5) 116.2(11) no . . .
Pd(3) C(6) H(6) 94.7(8) no . . .
C(5) C(6) H(6) 115.5(13) no . . .
C(7) C(6) H(6) 115.4(11) no . . .
Pd(1) C(7) H(7) 92.0(7) no . . .
C(1) C(7) H(7) 116.3(12) no . . .
C(6) C(7) H(7) 116.3(11) no . . .
Pd(1) C(8) H(8) 95.2(8) no . . .
C(9) C(8) H(8) 116.1(12) no . . .
C(14) C(8) H(8) 116.3(11) no . . .
Pd(2) C(9) H(9) 91.5(7) no . . .
C(8) C(9) H(9) 114.4(13) no . . .
C(10) C(9) H(9) 114.6(11) no . . .
Pd(2) C(10) H(10) 89.6(7) no . . .
C(9) C(10) H(10) 115.9(11) no . . .
C(11) C(10) H(10) 116.0(11) no . . .
Pd(3) C(11) H(11) 101.9(8) no . . .
C(10) C(11) H(11) 116.7(10) no . . .
C(12) C(11) H(11) 116.5(12) no . . .
Pd(3) C(12) H(12) 100.6(7) no . . .
C(11) C(12) H(12) 116.0(11) no . . .
C(13) C(12) H(12) 115.9(10) no . . .
C(12) C(13) H(13) 114.9(13) no . . .
C(14) C(13) H(13) 114.9(12) no . . .
Pd(1) C(14) H(14) 98.5(8) no . . .
C(8) C(14) H(14) 116.0(13) no . . .
C(13) C(14) H(14) 116.2(11) no . . .
Pd(5) C(15) H(15) 98.5 no . . .
C(16) C(15) H(15) 115.1 no . . .
C(21) C(15) H(15) 114.9 no . . .
C(15) C(16) H(16) 115.9 no . . .
C(17) C(16) H(16) 116.0 no . . .
Pd(4) C(17) H(17) 98.0 no . . .
C(16) C(17) H(17) 116.3 no . . .
C(18) C(17) H(17) 116.5 no . . .
Pd(4) C(18) H(18) 95.0 no . . .
C(17) C(18) H(18) 115.4 no . . .
C(19) C(18) H(18) 115.7 no . . .
Pd(6) C(19) H(19) 93.1 no . . .
C(18) C(19) H(19) 115.3 no . . .
C(20) C(19) H(19) 115.4 no . . .
Pd(6) C(20) H(20) 95.0 no . . .
C(19) C(20) H(20) 116.1 no . . .
C(21) C(20) H(20) 116.0 no . . .
Pd(5) C(21) H(21) 93.6 no . . .
C(15) C(21) H(21) 116.2 no . . .
C(20) C(21) H(21) 116.2 no . . .
Pd(5) C(22) H(22) 90.8 no . . .
C(23) C(22) H(22) 115.7 no . . .
C(28) C(22) H(22) 115.3 no . . .
C(22) C(23) H(23) 115.2 no . . .
C(24) C(23) H(23) 114.8 no . . .
Pd(4) C(24) H(24) 101.1 no . . .
C(23) C(24) H(24) 115.8 no . . .
C(25) C(24) H(24) 115.4 no . . .
Pd(4) C(25) H(25) 100.9 no . . .
C(24) C(25) H(25) 116.1 no . . .
C(26) C(25) H(25) 116.0 no . . .
Pd(6) C(26) H(26) 95.1 no . . .
C(25) C(26) H(26) 115.4 no . . .
C(27) C(26) H(26) 115.3 no . . .
Pd(6) C(27) H(27) 94.1 no . . .
C(26) C(27) H(27) 116.1 no . . .
C(28) C(27) H(27) 116.0 no . . .
Pd(5) C(28) H(28) 93.9 no . . .
C(22) C(28) H(28) 116.8 no . . .
C(27) C(28) H(28) 116.4 no . . .
C(29) C(30) H(29) 109.9(12) no . . .
C(29) C(30) H(30) 109.4(16) no . . .
C(29) C(30) H(31) 109.0(14) no . . .
H(29) C(30) H(30) 109.5(16) no . . .
H(29) C(30) H(31) 109.5(19) no . . .
H(30) C(30) H(31) 109.5(14) no . . .
C(31) C(32) H(32) 109.4(12) no . . .
C(31) C(32) H(33) 109.5(12) no . . .
C(31) C(32) H(34) 109.5(15) no . . .
H(32) C(32) H(33) 109(2) no . . .
H(32) C(32) H(34) 109.5(16) no . . .
H(33) C(32) H(34) 109.5(15) no . . .
C(33) C(34) H(35) 109.2(11) no . . .
C(33) C(34) H(36) 109.6(12) no . . .
C(33) C(34) H(37) 109.6(11) no . . .
H(35) C(34) H(36) 109.5(15) no . . .
H(35) C(34) H(37) 109.5(15) no . . .
H(36) C(34) H(37) 109.5(14) no . . .
C(35) C(36) H(38) 109.7(11) no . . .
C(35) C(36) H(39) 109.6(14) no . . .
C(35) C(36) H(40) 109.1(11) no . . .
H(38) C(36) H(39) 109.5(14) no . . .
H(38) C(36) H(40) 109.5(17) no . . .
H(39) C(36) H(40) 109.5(14) no . . .
C(37) C(38) H(41) 109.9(15) no . . .
C(37) C(38) H(42) 109.1(17) no . . .
C(37) C(38) H(43) 109.4(18) no . . .
H(41) C(38) H(42) 109(2) no . . .
H(41) C(38) H(43) 109(2) no . . .
H(42) C(38) H(43) 109.5(17) no . . .

loop_
_geom_torsion_atom_site_label_1
_geom_torsion_atom_site_label_2
_geom_torsion_atom_site_label_3
_geom_torsion_atom_site_label_4
_geom_torsion
_geom_torsion_publ_flag
_geom_torsion_site_symmetry_1
_geom_torsion_site_symmetry_2
_geom_torsion_site_symmetry_3
_geom_torsion_site_symmetry_4
Pd(2) Pd(1) Pd(3) Pd(4) -178.10(5) ? . . . .
Pd(2) Pd(1) Pd(3) C(5) 80.7(2) ? . . . .
Pd(2) Pd(1) Pd(3) C(6) 107.6(2) ? . . . .
Pd(2) Pd(1) Pd(3) C(11) -60.5(2) ? . . . .
Pd(2) Pd(1) Pd(3) C(12) -96.9(2) ? . . . .
Pd(3) Pd(1) Pd(2) N(2) 165.5(3) ? . . . .
Pd(3) Pd(1) Pd(2) C(2) -107.4(2) ? . . . .
Pd(3) Pd(1) Pd(2) C(3) -81.7(3) ? . . . .
Pd(3) Pd(1) Pd(2) C(9) 101.5(3) ? . . . .
Pd(3) Pd(1) Pd(2) C(10) 70.8(2) ? . . . .
Pd(2) Pd(1) N(1) C(29) -3(3) ? . . . .
N(1) Pd(1) Pd(2) Pd(3) 175.8(3) ? . . . .
N(1) Pd(1) Pd(2) N(2) -18.8(4) ? . . . .
N(1) Pd(1) Pd(2) C(2) 68.3(4) ? . . . .
N(1) Pd(1) Pd(2) C(3) 94.1(4) ? . . . .
N(1) Pd(1) Pd(2) C(9) -82.8(4) ? . . . .
N(1) Pd(1) Pd(2) C(10) -113.5(4) ? . . . .
Pd(2) Pd(1) C(1) C(2) 8.9(6) ? . . . .
Pd(2) Pd(1) C(1) C(7) -117.2(5) ? . . . .
C(1) Pd(1) Pd(2) Pd(3) 101.9(2) ? . . . .
C(1) Pd(1) Pd(2) N(2) -92.6(4) ? . . . .
C(1) Pd(1) Pd(2) C(2) -5.5(4) ? . . . .
C(1) Pd(1) Pd(2) C(3) 20.2(4) ? . . . .
C(1) Pd(1) Pd(2) C(9) -156.6(4) ? . . . .
C(1) Pd(1) Pd(2) C(10) 172.7(4) ? . . . .
Pd(2) Pd(1) C(7) C(1) 59.4(5) ? . . . .
Pd(2) Pd(1) C(7) C(6) -65.2(5) ? . . . .
C(7) Pd(1) Pd(2) Pd(3) 69.0(2) ? . . . .
C(7) Pd(1) Pd(2) N(2) -125.5(4) ? . . . .
C(7) Pd(1) Pd(2) C(2) -38.4(4) ? . . . .
C(7) Pd(1) Pd(2) C(3) -12.7(4) ? . . . .
C(7) Pd(1) Pd(2) C(9) 170.4(4) ? . . . .
C(7) Pd(1) Pd(2) C(10) 139.7(4) ? . . . .
Pd(2) Pd(1) C(8) C(9) 4.5(7) ? . . . .
Pd(2) Pd(1) C(8) C(14) 129.7(6) ? . . . .
C(8) Pd(1) Pd(2) Pd(3) -104.4(3) ? . . . .
C(8) Pd(1) Pd(2) N(2) 61.1(4) ? . . . .
C(8) Pd(1) Pd(2) C(2) 148.2(4) ? . . . .
C(8) Pd(1) Pd(2) C(3) 173.9(4) ? . . . .
C(8) Pd(1) Pd(2) C(9) -2.9(4) ? . . . .
C(8) Pd(1) Pd(2) C(10) -33.6(4) ? . . . .
Pd(2) Pd(1) C(14) C(8) -48.3(6) ? . . . .
Pd(2) Pd(1) C(14) C(13) 78.3(5) ? . . . .
C(14) Pd(1) Pd(2) Pd(3) -76.4(3) ? . . . .
C(14) Pd(1) Pd(2) N(2) 89.1(4) ? . . . .
C(14) Pd(1) Pd(2) C(2) 176.2(4) ? . . . .
C(14) Pd(1) Pd(2) C(3) -158.1(4) ? . . . .
C(14) Pd(1) Pd(2) C(9) 25.0(4) ? . . . .
C(14) Pd(1) Pd(2) C(10) -5.7(4) ? . . . .
Pd(3) Pd(1) N(1) C(29) 170(2) ? . . . .
N(1) Pd(1) Pd(3) Pd(2) -175.4(3) ? . . . .
N(1) Pd(1) Pd(3) Pd(4) 6.5(4) ? . . . .
N(1) Pd(1) Pd(3) C(5) -94.7(4) ? . . . .
N(1) Pd(1) Pd(3) C(6) -67.8(4) ? . . . .
N(1) Pd(1) Pd(3) C(11) 124.1(4) ? . . . .
N(1) Pd(1) Pd(3) C(12) 87.7(4) ? . . . .
Pd(3) Pd(1) C(1) C(2) 68.5(7) ? . . . .
Pd(3) Pd(1) C(1) C(7) -57.6(5) ? . . . .
C(1) Pd(1) Pd(3) Pd(2) -71.1(2) ? . . . .
C(1) Pd(1) Pd(3) Pd(4) 110.8(2) ? . . . .
C(1) Pd(1) Pd(3) C(5) 9.6(3) ? . . . .
C(1) Pd(1) Pd(3) C(6) 36.5(3) ? . . . .
C(1) Pd(1) Pd(3) C(11) -131.6(3) ? . . . .
C(1) Pd(1) Pd(3) C(12) -168.0(3) ? . . . .
Pd(3) Pd(1) C(7) C(1) 118.4(5) ? . . . .
Pd(3) Pd(1) C(7) C(6) -6.2(5) ? . . . .
C(7) Pd(1) Pd(3) Pd(2) -103.6(2) ? . . . .
C(7) Pd(1) Pd(3) Pd(4) 78.3(2) ? . . . .
C(7) Pd(1) Pd(3) C(5) -22.9(3) ? . . . .
C(7) Pd(1) Pd(3) C(6) 4.0(3) ? . . . .
C(7) Pd(1) Pd(3) C(11) -164.1(3) ? . . . .
C(7) Pd(1) Pd(3) C(12) 159.5(3) ? . . . .
Pd(3) Pd(1) C(8) C(9) -54.3(8) ? . . . .
Pd(3) Pd(1) C(8) C(14) 70.9(6) ? . . . .
C(8) Pd(1) Pd(3) Pd(2) 68.8(2) ? . . . .
C(8) Pd(1) Pd(3) Pd(4) -109.3(2) ? . . . .
C(8) Pd(1) Pd(3) C(5) 149.6(3) ? . . . .
C(8) Pd(1) Pd(3) C(6) 176.4(3) ? . . . .
C(8) Pd(1) Pd(3) C(11) 8.4(3) ? . . . .
C(8) Pd(1) Pd(3) C(12) -28.1(3) ? . . . .
Pd(3) Pd(1) C(14) C(8) -108.0(6) ? . . . .
Pd(3) Pd(1) C(14) C(13) 18.6(5) ? . . . .
C(14) Pd(1) Pd(3) Pd(2) 104.0(2) ? . . . .
C(14) Pd(1) Pd(3) Pd(4) -74.1(2) ? . . . .
C(14) Pd(1) Pd(3) C(5) -175.3(3) ? . . . .
C(14) Pd(1) Pd(3) C(6) -148.5(3) ? . . . .
C(14) Pd(1) Pd(3) C(11) 43.5(3) ? . . . .
C(14) Pd(1) Pd(3) C(12) 7.0(3) ? . . . .
N(1) Pd(1) C(1) C(2) -140.0(7) ? . . . .
N(1) Pd(1) C(1) C(7) 93.9(6) ? . . . .
C(1) Pd(1) N(1) C(29) 66(2) ? . . . .
N(1) Pd(1) C(7) C(1) -89.6(6) ? . . . .
N(1) Pd(1) C(7) C(6) 145.8(6) ? . . . .
C(7) Pd(1) N(1) C(29) 103(2) ? . . . .
N(1) Pd(1) C(8) C(9) 152.3(8) ? . . . .
N(1) Pd(1) C(8) C(14) -82.5(6) ? . . . .
C(8) Pd(1) N(1) C(29) -76(2) ? . . . .
N(1) Pd(1) C(14) C(8) 101.0(6) ? . . . .
N(1) Pd(1) C(14) C(13) -132.4(5) ? . . . .
C(14) Pd(1) N(1) C(29) -112(2) ? . . . .
C(1) Pd(1) C(7) C(6) -124.6(8) ? . . . .
C(7) Pd(1) C(1) C(2) 126.1(10) ? . . . .
C(1) Pd(1) C(8) C(9) 45.5(11) ? . . . .
C(1) Pd(1) C(8) C(14) 170.7(6) ? . . . .
C(8) Pd(1) C(1) C(2) -31.8(11) ? . . . .
C(8) Pd(1) C(1) C(7) -157.9(6) ? . . . .
C(1) Pd(1) C(14) C(8) -62(3) ? . . . .
C(1) Pd(1) C(14) C(13) 65(3) ? . . . .
C(14) Pd(1) C(1) C(2) 23(3) ? . . . .
C(14) Pd(1) C(1) C(7) -103(3) ? . . . .
C(7) Pd(1) C(8) C(9) -23(2) ? . . . .
C(7) Pd(1) C(8) C(14) 101.8(16) ? . . . .
C(8) Pd(1) C(7) C(1) 86.2(18) ? . . . .
C(8) Pd(1) C(7) C(6) -38.4(19) ? . . . .
C(7) Pd(1) C(14) C(8) -156.1(6) ? . . . .
C(7) Pd(1) C(14) C(13) -29.5(9) ? . . . .
C(14) Pd(1) C(7) C(1) 168.7(6) ? . . . .
C(14) Pd(1) C(7) C(6) 44.1(9) ? . . . .
C(8) Pd(1) C(14) C(13) 126.6(9) ? . . . .
C(14) Pd(1) C(8) C(9) -125.2(11) ? . . . .
Pd(1) Pd(2) Pd(3) Pd(4) 177.70(7) ? . . . .
Pd(1) Pd(2) Pd(3) C(5) -100.5(2) ? . . . .
Pd(1) Pd(2) Pd(3) C(6) -64.2(2) ? . . . .
Pd(1) Pd(2) Pd(3) C(11) 111.9(2) ? . . . .
Pd(1) Pd(2) Pd(3) C(12) 87.5(2) ? . . . .
Pd(1) Pd(2) N(2) C(31) -66(2) ? . . . .
Pd(1) Pd(2) C(2) C(1) 8.7(6) ? . . . .
Pd(1) Pd(2) C(2) C(3) 134.7(5) ? . . . .
Pd(1) Pd(2) C(3) C(2) -43.0(5) ? . . . .
Pd(1) Pd(2) C(3) C(4) 84.1(5) ? . . . .
Pd(1) Pd(2) C(9) C(8) 4.7(7) ? . . . .
Pd(1) Pd(2) C(9) C(10) -123.0(5) ? . . . .
Pd(1) Pd(2) C(10) C(9) 53.3(5) ? . . . .
Pd(1) Pd(2) C(10) C(11) -72.2(6) ? . . . .
Pd(3) Pd(2) N(2) C(31) 83(2) ? . . . .
N(2) Pd(2) Pd(3) Pd(1) -159.0(4) ? . . . .
N(2) Pd(2) Pd(3) Pd(4) 18.7(4) ? . . . .
N(2) Pd(2) Pd(3) C(5) 100.5(5) ? . . . .
N(2) Pd(2) Pd(3) C(6) 136.8(5) ? . . . .
N(2) Pd(2) Pd(3) C(11) -47.1(5) ? . . . .
N(2) Pd(2) Pd(3) C(12) -71.5(5) ? . . . .
Pd(3) Pd(2) C(2) C(1) -48.4(7) ? . . . .
Pd(3) Pd(2) C(2) C(3) 77.6(5) ? . . . .
C(2) Pd(2) Pd(3) Pd(1) 65.4(2) ? . . . .
C(2) Pd(2) Pd(3) Pd(4) -116.9(2) ? . . . .
C(2) Pd(2) Pd(3) C(5) -35.0(3) ? . . . .
C(2) Pd(2) Pd(3) C(6) 1.2(3) ? . . . .
C(2) Pd(2) Pd(3) C(11) 177.3(3) ? . . . .
C(2) Pd(2) Pd(3) C(12) 152.9(3) ? . . . .
Pd(3) Pd(2) C(3) C(2) -103.2(5) ? . . . .
Pd(3) Pd(2) C(3) C(4) 23.9(5) ? . . . .
C(3) Pd(2) Pd(3) Pd(1) 101.6(2) ? . . . .
C(3) Pd(2) Pd(3) Pd(4) -80.7(2) ? . . . .
C(3) Pd(2) Pd(3) C(5) 1.2(3) ? . . . .
C(3) Pd(2) Pd(3) C(6) 37.4(3) ? . . . .
C(3) Pd(2) Pd(3) C(11) -146.5(3) ? . . . .
C(3) Pd(2) Pd(3) C(12) -170.9(3) ? . . . .
Pd(3) Pd(2) C(9) C(8) 63.9(8) ? . . . .
Pd(3) Pd(2) C(9) C(10) -63.8(4) ? . . . .
C(9) Pd(2) Pd(3) Pd(1) -69.1(2) ? . . . .
C(9) Pd(2) Pd(3) Pd(4) 108.6(2) ? . . . .
C(9) Pd(2) Pd(3) C(5) -169.5(4) ? . . . .
C(9) Pd(2) Pd(3) C(6) -133.3(3) ? . . . .
C(9) Pd(2) Pd(3) C(11) 42.8(3) ? . . . .
C(9) Pd(2) Pd(3) C(12) 18.5(3) ? . . . .
Pd(3) Pd(2) C(10) C(9) 112.0(5) ? . . . .
Pd(3) Pd(2) C(10) C(11) -13.5(5) ? . . . .
C(10) Pd(2) Pd(3) Pd(1) -103.3(2) ? . . . .
C(10) Pd(2) Pd(3) Pd(4) 74.4(2) ? . . . .
C(10) Pd(2) Pd(3) C(5) 156.2(3) ? . . . .
C(10) Pd(2) Pd(3) C(6) -167.6(3) ? . . . .
C(10) Pd(2) Pd(3) C(11) 8.5(3) ? . . . .
C(10) Pd(2) Pd(3) C(12) -15.8(3) ? . . . .
N(2) Pd(2) C(2) C(1) 149.6(7) ? . . . .
N(2) Pd(2) C(2) C(3) -84.4(5) ? . . . .
C(2) Pd(2) N(2) C(31) -143(2) ? . . . .
N(2) Pd(2) C(3) C(2) 102.1(5) ? . . . .
N(2) Pd(2) C(3) C(4) -130.8(6) ? . . . .
C(3) Pd(2) N(2) C(31) -179.8(18) ? . . . .
N(2) Pd(2) C(9) C(8) -141.7(8) ? . . . .
N(2) Pd(2) C(9) C(10) 90.6(5) ? . . . .
C(9) Pd(2) N(2) C(31) -7(2) ? . . . .
N(2) Pd(2) C(10) C(9) -88.9(5) ? . . . .
N(2) Pd(2) C(10) C(11) 145.6(6) ? . . . .
C(10) Pd(2) N(2) C(31) 30(2) ? . . . .
C(2) Pd(2) C(3) C(4) 127.1(8) ? . . . .
C(3) Pd(2) C(2) C(1) -126.0(9) ? . . . .
C(2) Pd(2) C(9) C(8) -34.9(10) ? . . . .
C(2) Pd(2) C(9) C(10) -162.6(5) ? . . . .
C(9) Pd(2) C(2) C(1) 48.5(9) ? . . . .
C(9) Pd(2) C(2) C(3) 174.5(5) ? . . . .
C(2) Pd(2) C(10) C(9) 60.3(17) ? . . . .
C(2) Pd(2) C(10) C(11) -65.2(18) ? . . . .
C(10) Pd(2) C(2) C(1) 1(2) ? . . . .
C(10) Pd(2) C(2) C(3) 127.3(14) ? . . . .
C(3) Pd(2) C(9) C(8) -15(3) ? . . . .
C(3) Pd(2) C(9) C(10) -142(2) ? . . . .
C(9) Pd(2) C(3) C(2) -24(2) ? . . . .
C(9) Pd(2) C(3) C(4) 103(2) ? . . . .
C(3) Pd(2) C(10) C(9) 168.5(6) ? . . . .
C(3) Pd(2) C(10) C(11) 43.0(9) ? . . . .
C(10) Pd(2) C(3) C(2) -157.1(6) ? . . . .
C(10) Pd(2) C(3) C(4) -30.0(9) ? . . . .
C(9) Pd(2) C(10) C(11) -125.5(8) ? . . . .
C(10) Pd(2) C(9) C(8) 127.7(10) ? . . . .
Pd(1) Pd(3) Pd(4) Pd(5) -94.32(7) ? . . . .
Pd(1) Pd(3) Pd(4) Pd(6) 91.91(9) ? . . . .
Pd(1) Pd(3) Pd(4) C(17) -172.9(2) ? . . . .
Pd(1) Pd(3) Pd(4) C(18) 153.1(2) ? . . . .
Pd(1) Pd(3) Pd(4) C(24) -3.5(2) ? . . . .
Pd(1) Pd(3) Pd(4) C(25) 28.5(2) ? . . . .
Pd(1) Pd(3) C(5) C(4) -82.1(7) ? . . . .
Pd(1) Pd(3) C(5) C(6) 45.1(6) ? . . . .
Pd(1) Pd(3) C(6) C(5) -131.7(6) ? . . . .
Pd(1) Pd(3) C(6) C(7) -6.2(5) ? . . . .
Pd(1) Pd(3) C(11) C(10) 38.8(6) ? . . . .
Pd(1) Pd(3) C(11) C(12) -85.0(6) ? . . . .
Pd(1) Pd(3) C(12) C(11) 97.3(6) ? . . . .
Pd(1) Pd(3) C(12) C(13) -31.3(6) ? . . . .
Pd(2) Pd(3) Pd(4) Pd(5) 89.38(8) ? . . . .
Pd(2) Pd(3) Pd(4) Pd(6) -84.40(11) ? . . . .
Pd(2) Pd(3) Pd(4) C(17) 10.8(2) ? . . . .
Pd(2) Pd(3) Pd(4) C(18) -23.2(2) ? . . . .
Pd(2) Pd(3) Pd(4) C(24) -179.8(2) ? . . . .
Pd(2) Pd(3) Pd(4) C(25) -147.8(2) ? . . . .
Pd(2) Pd(3) C(5) C(4) -25.9(6) ? . . . .
Pd(2) Pd(3) C(5) C(6) 101.3(6) ? . . . .
Pd(2) Pd(3) C(6) C(5) -78.4(6) ? . . . .
Pd(2) Pd(3) C(6) C(7) 47.1(5) ? . . . .
Pd(2) Pd(3) C(11) C(10) -12.8(5) ? . . . .
Pd(2) Pd(3) C(11) C(12) -136.6(7) ? . . . .
Pd(2) Pd(3) C(12) C(11) 40.2(6) ? . . . .
Pd(2) Pd(3) C(12) C(13) -88.4(5) ? . . . .
Pd(4) Pd(3) C(5) C(4) 128.8(7) ? . . . .
Pd(4) Pd(3) C(5) C(6) -104.0(6) ? . . . .
C(5) Pd(3) Pd(4) Pd(5) 8.6(2) ? . . . .
C(5) Pd(3) Pd(4) Pd(6) -165.2(2) ? . . . .
C(5) Pd(3) Pd(4) C(17) -70.0(3) ? . . . .
C(5) Pd(3) Pd(4) C(18) -104.0(3) ? . . . .
C(5) Pd(3) Pd(4) C(24) 99.4(3) ? . . . .
C(5) Pd(3) Pd(4) C(25) 131.4(3) ? . . . .
Pd(4) Pd(3) C(6) C(5) 78.9(6) ? . . . .
Pd(4) Pd(3) C(6) C(7) -155.6(5) ? . . . .
C(6) Pd(3) Pd(4) Pd(5) -27.6(2) ? . . . .
C(6) Pd(3) Pd(4) Pd(6) 158.6(2) ? . . . .
C(6) Pd(3) Pd(4) C(17) -106.2(3) ? . . . .
C(6) Pd(3) Pd(4) C(18) -140.2(3) ? . . . .
C(6) Pd(3) Pd(4) C(24) 63.2(3) ? . . . .
C(6) Pd(3) Pd(4) C(25) 95.2(3) ? . . . .
Pd(4) Pd(3) C(11) C(10) -169.2(5) ? . . . .
Pd(4) Pd(3) C(11) C(12) 67.0(6) ? . . . .
C(11) Pd(3) Pd(4) Pd(5) 149.0(2) ? . . . .
C(11) Pd(3) Pd(4) Pd(6) -24.8(2) ? . . . .
C(11) Pd(3) Pd(4) C(17) 70.4(3) ? . . . .
C(11) Pd(3) Pd(4) C(18) 36.4(3) ? . . . .
C(11) Pd(3) Pd(4) C(24) -120.2(3) ? . . . .
C(11) Pd(3) Pd(4) C(25) -88.2(3) ? . . . .
Pd(4) Pd(3) C(12) C(11) -114.0(6) ? . . . .
Pd(4) Pd(3) C(12) C(13) 117.4(6) ? . . . .
C(12) Pd(3) Pd(4) Pd(5) -177.6(2) ? . . . .
C(12) Pd(3) Pd(4) Pd(6) 8.6(2) ? . . . .
C(12) Pd(3) Pd(4) C(17) 103.8(3) ? . . . .
C(12) Pd(3) Pd(4) C(18) 69.9(3) ? . . . .
C(12) Pd(3) Pd(4) C(24) -86.7(3) ? . . . .
C(12) Pd(3) Pd(4) C(25) -54.7(3) ? . . . .
C(5) Pd(3) C(6) C(7) 125.5(9) ? . . . .
C(6) Pd(3) C(5) C(4) -127.2(11) ? . . . .
C(5) Pd(3) C(11) C(10) -67.9(9) ? . . . .
C(5) Pd(3) C(11) C(12) 168.3(7) ? . . . .
C(11) Pd(3) C(5) C(4) 24.3(11) ? . . . .
C(11) Pd(3) C(5) C(6) 151.5(6) ? . . . .
C(5) Pd(3) C(12) C(11) -66(2) ? . . . .
C(5) Pd(3) C(12) C(13) 165(2) ? . . . .
C(12) Pd(3) C(5) C(4) 81(2) ? . . . .
C(12) Pd(3) C(5) C(6) -152(2) ? . . . .
C(6) Pd(3) C(11) C(10) -0.1(13) ? . . . .
C(6) Pd(3) C(11) C(12) -123.9(11) ? . . . .
C(11) Pd(3) C(6) C(5) -90.2(13) ? . . . .
C(11) Pd(3) C(6) C(7) 35.3(14) ? . . . .
C(6) Pd(3) C(12) C(11) 148.9(7) ? . . . .
C(6) Pd(3) C(12) C(13) 20.3(11) ? . . . .
C(12) Pd(3) C(6) C(5) 172.1(8) ? . . . .
C(12) Pd(3) C(6) C(7) -62.4(10) ? . . . .
C(11) Pd(3) C(12) C(13) -128.6(10) ? . . . .
C(12) Pd(3) C(11) C(10) 123.8(10) ? . . . .
Pd(3) Pd(4) Pd(5) Pd(6) -177.10(6) ? . . . .
Pd(3) Pd(4) Pd(5) N(3) 2.8(3) ? . . . .
Pd(3) Pd(4) Pd(5) C(15) -78.3(2) ? . . . .
Pd(3) Pd(4) Pd(5) C(21) -113.3(2) ? . . . .
Pd(3) Pd(4) Pd(5) C(22) 80.5(2) ? . . . .
Pd(3) Pd(4) Pd(5) C(28) 115.1(2) ? . . . .
Pd(3) Pd(4) Pd(6) Pd(5) 175.87(9) ? . . . .
Pd(3) Pd(4) Pd(6) N(4) 2.0(4) ? . . . .
Pd(3) Pd(4) Pd(6) C(19) 69.9(2) ? . . . .
Pd(3) Pd(4) Pd(6) C(20) 101.9(2) ? . . . .
Pd(3) Pd(4) Pd(6) C(26) -77.9(2) ? . . . .
Pd(3) Pd(4) Pd(6) C(27) -111.6(2) ? . . . .
Pd(3) Pd(4) C(17) C(16) 122.0(6) ? . . . .
Pd(3) Pd(4) C(17) C(18) -111.2(6) ? . . . .
Pd(3) Pd(4) C(18) C(17) 70.2(6) ? . . . .
Pd(3) Pd(4) C(18) C(19) -164.3(5) ? . . . .
Pd(3) Pd(4) C(24) C(23) -113.4(7) ? . . . .
Pd(3) Pd(4) C(24) C(25) 117.1(6) ? . . . .
Pd(3) Pd(4) C(25) C(24) -66.0(6) ? . . . .
Pd(3) Pd(4) C(25) C(26) 169.9(5) ? . . . .
Pd(5) Pd(4) Pd(6) N(4) -173.9(4) ? . . . .
Pd(5) Pd(4) Pd(6) C(19) -106.0(2) ? . . . .
Pd(5) Pd(4) Pd(6) C(20) -74.0(2) ? . . . .
Pd(5) Pd(4) Pd(6) C(26) 106.3(2) ? . . . .
Pd(5) Pd(4) Pd(6) C(27) 72.5(2) ? . . . .
Pd(6) Pd(4) Pd(5) N(3) 179.9(2) ? . . . .
Pd(6) Pd(4) Pd(5) C(15) 98.8(2) ? . . . .
Pd(6) Pd(4) Pd(5) C(21) 63.7(2) ? . . . .
Pd(6) Pd(4) Pd(5) C(22) -102.4(2) ? . . . .
Pd(6) Pd(4) Pd(5) C(28) -67.8(2) ? . . . .
Pd(5) Pd(4) C(17) C(16) -25.0(6) ? . . . .
Pd(5) Pd(4) C(17) C(18) 101.8(6) ? . . . .
C(17) Pd(4) Pd(5) Pd(6) -99.0(2) ? . . . .
C(17) Pd(4) Pd(5) N(3) 80.9(4) ? . . . .
C(17) Pd(4) Pd(5) C(15) -0.2(3) ? . . . .
C(17) Pd(4) Pd(5) C(21) -35.3(3) ? . . . .
C(17) Pd(4) Pd(5) C(22) 158.6(3) ? . . . .
C(17) Pd(4) Pd(5) C(28) -166.9(3) ? . . . .
Pd(5) Pd(4) C(18) C(17) -78.9(6) ? . . . .
Pd(5) Pd(4) C(18) C(19) 46.5(6) ? . . . .
C(18) Pd(4) Pd(5) Pd(6) -63.4(2) ? . . . .
C(18) Pd(4) Pd(5) N(3) 116.5(4) ? . . . .
C(18) Pd(4) Pd(5) C(15) 35.4(3) ? . . . .
C(18) Pd(4) Pd(5) C(21) 0.3(3) ? . . . .
C(18) Pd(4) Pd(5) C(22) -165.8(3) ? . . . .
C(18) Pd(4) Pd(5) C(28) -131.3(3) ? . . . .
Pd(5) Pd(4) C(24) C(23) 33.0(7) ? . . . .
Pd(5) Pd(4) C(24) C(25) -96.5(6) ? . . . .
C(24) Pd(4) Pd(5) Pd(6) 93.5(2) ? . . . .
C(24) Pd(4) Pd(5) N(3) -86.6(4) ? . . . .
C(24) Pd(4) Pd(5) C(15) -167.6(3) ? . . . .
C(24) Pd(4) Pd(5) C(21) 157.3(3) ? . . . .
C(24) Pd(4) Pd(5) C(22) -8.8(3) ? . . . .
C(24) Pd(4) Pd(5) C(28) 25.7(4) ? . . . .
Pd(5) Pd(4) C(25) C(24) 86.1(6) ? . . . .
Pd(5) Pd(4) C(25) C(26) -38.0(5) ? . . . .
C(25) Pd(4) Pd(5) Pd(6) 58.2(2) ? . . . .
C(25) Pd(4) Pd(5) N(3) -121.9(4) ? . . . .
C(25) Pd(4) Pd(5) C(15) 157.0(3) ? . . . .
C(25) Pd(4) Pd(5) C(21) 121.9(3) ? . . . .
C(25) Pd(4) Pd(5) C(22) -44.2(3) ? . . . .
C(25) Pd(4) Pd(5) C(28) -9.7(4) ? . . . .
Pd(6) Pd(4) C(17) C(16) -80.9(6) ? . . . .
Pd(6) Pd(4) C(17) C(18) 45.9(6) ? . . . .
C(17) Pd(4) Pd(6) Pd(5) 82.8(2) ? . . . .
C(17) Pd(4) Pd(6) N(4) -91.1(4) ? . . . .
C(17) Pd(4) Pd(6) C(19) -23.2(3) ? . . . .
C(17) Pd(4) Pd(6) C(20) 8.8(3) ? . . . .
C(17) Pd(4) Pd(6) C(26) -171.0(3) ? . . . .
C(17) Pd(4) Pd(6) C(27) 155.3(3) ? . . . .
Pd(6) Pd(4) C(18) C(17) -131.0(7) ? . . . .
Pd(6) Pd(4) C(18) C(19) -5.5(5) ? . . . .
C(18) Pd(4) Pd(6) Pd(5) 109.5(2) ? . . . .
C(18) Pd(4) Pd(6) N(4) -64.4(4) ? . . . .
C(18) Pd(4) Pd(6) C(19) 3.5(3) ? . . . .
C(18) Pd(4) Pd(6) C(20) 35.5(3) ? . . . .
C(18) Pd(4) Pd(6) C(26) -144.2(3) ? . . . .
C(18) Pd(4) Pd(6) C(27) -178.0(3) ? . . . .
Pd(6) Pd(4) C(24) C(23) 89.5(7) ? . . . .
Pd(6) Pd(4) C(24) C(25) -40.0(6) ? . . . .
C(24) Pd(4) Pd(6) Pd(5) -90.1(2) ? . . . .
C(24) Pd(4) Pd(6) N(4) 96.0(4) ? . . . .
C(24) Pd(4) Pd(6) C(19) 163.9(3) ? . . . .
C(24) Pd(4) Pd(6) C(20) -164.1(3) ? . . . .
C(24) Pd(4) Pd(6) C(26) 16.1(3) ? . . . .
C(24) Pd(4) Pd(6) C(27) -17.6(3) ? . . . .
Pd(6) Pd(4) C(25) C(24) 136.1(7) ? . . . .
Pd(6) Pd(4) C(25) C(26) 12.0(5) ? . . . .
C(25) Pd(4) Pd(6) Pd(5) -113.9(2) ? . . . .
C(25) Pd(4) Pd(6) N(4) 72.2(4) ? . . . .
C(25) Pd(4) Pd(6) C(19) 140.1(3) ? . . . .
C(25) Pd(4) Pd(6) C(20) 172.1(3) ? . . . .
C(25) Pd(4) Pd(6) C(26) -7.6(3) ? . . . .
C(25) Pd(4) Pd(6) C(27) -41.4(3) ? . . . .
C(17) Pd(4) C(18) C(19) 125.5(10) ? . . . .
C(18) Pd(4) C(17) C(16) -126.8(11) ? . . . .
C(17) Pd(4) C(24) C(23) -56(2) ? . . . .
C(17) Pd(4) C(24) C(25) 174.5(18) ? . . . .
C(24) Pd(4) C(17) C(16) 64(2) ? . . . .
C(24) Pd(4) C(17) C(18) -168.7(18) ? . . . .
C(17) Pd(4) C(25) C(24) -177.0(10) ? . . . .
C(17) Pd(4) C(25) C(26) 58.9(12) ? . . . .
C(25) Pd(4) C(17) C(16) -123.7(10) ? . . . .
C(25) Pd(4) C(17) C(18) 3.1(14) ? . . . .
C(18) Pd(4) C(24) C(23) 140.5(9) ? . . . .
C(18) Pd(4) C(24) C(25) 11.0(14) ? . . . .
C(24) Pd(4) C(18) C(17) 174.0(10) ? . . . .
C(24) Pd(4) C(18) C(19) -60.5(13) ? . . . .
C(18) Pd(4) C(25) C(24) -174.8(6) ? . . . .
C(18) Pd(4) C(25) C(26) 61.1(7) ? . . . .
C(25) Pd(4) C(18) C(17) -178.6(6) ? . . . .
C(25) Pd(4) C(18) C(19) -53.1(7) ? . . . .
C(24) Pd(4) C(25) C(26) -124.1(9) ? . . . .
C(25) Pd(4) C(24) C(23) 129.5(11) ? . . . .
Pd(4) Pd(5) Pd(6) N(4) 173.0(4) ? . . . .
Pd(4) Pd(5) Pd(6) C(19) 67.6(3) ? . . . .
Pd(4) Pd(5) Pd(6) C(20) 101.1(3) ? . . . .
Pd(4) Pd(5) Pd(6) C(26) -71.3(3) ? . . . .
Pd(4) Pd(5) Pd(6) C(27) -102.0(3) ? . . . .
Pd(4) Pd(5) N(3) C(33) -30(3) ? . . . .
Pd(4) Pd(5) C(15) C(16) 26.8(5) ? . . . .
Pd(4) Pd(5) C(15) C(21) -102.9(5) ? . . . .
Pd(4) Pd(5) C(21) C(15) 76.8(5) ? . . . .
Pd(4) Pd(5) C(21) C(20) -47.2(7) ? . . . .
Pd(4) Pd(5) C(22) C(23) -17.1(5) ? . . . .
Pd(4) Pd(5) C(22) C(28) 109.7(5) ? . . . .
Pd(4) Pd(5) C(28) C(22) -67.4(5) ? . . . .
Pd(4) Pd(5) C(28) C(27) 56.2(8) ? . . . .
Pd(6) Pd(5) N(3) C(33) 150(2) ? . . . .
N(3) Pd(5) Pd(6) Pd(4) -179.8(4) ? . . . .
N(3) Pd(5) Pd(6) N(4) -6.8(7) ? . . . .
N(3) Pd(5) Pd(6) C(19) -112.2(6) ? . . . .
N(3) Pd(5) Pd(6) C(20) -78.8(6) ? . . . .
N(3) Pd(5) Pd(6) C(26) 108.9(6) ? . . . .
N(3) Pd(5) Pd(6) C(27) 78.2(6) ? . . . .
Pd(6) Pd(5) C(15) C(16) 86.6(5) ? . . . .
Pd(6) Pd(5) C(15) C(21) -43.1(5) ? . . . .
C(15) Pd(5) Pd(6) Pd(4) -81.6(3) ? . . . .
C(15) Pd(5) Pd(6) N(4) 91.4(5) ? . . . .
C(15) Pd(5) Pd(6) C(19) -14.0(4) ? . . . .
C(15) Pd(5) Pd(6) C(20) 19.5(4) ? . . . .
C(15) Pd(5) Pd(6) C(26) -152.8(4) ? . . . .
C(15) Pd(5) Pd(6) C(27) 176.4(4) ? . . . .
Pd(6) Pd(5) C(21) C(15) 133.4(6) ? . . . .
Pd(6) Pd(5) C(21) C(20) 9.4(6) ? . . . .
C(21) Pd(5) Pd(6) Pd(4) -107.0(3) ? . . . .
C(21) Pd(5) Pd(6) N(4) 66.0(5) ? . . . .
C(21) Pd(5) Pd(6) C(19) -39.4(4) ? . . . .
C(21) Pd(5) Pd(6) C(20) -5.9(4) ? . . . .
C(21) Pd(5) Pd(6) C(26) -178.3(4) ? . . . .
C(21) Pd(5) Pd(6) C(27) 151.0(4) ? . . . .
Pd(6) Pd(5) C(22) C(23) -75.8(6) ? . . . .
Pd(6) Pd(5) C(22) C(28) 51.0(5) ? . . . .
C(22) Pd(5) Pd(6) Pd(4) 73.8(3) ? . . . .
C(22) Pd(5) Pd(6) N(4) -113.2(5) ? . . . .
C(22) Pd(5) Pd(6) C(19) 141.4(4) ? . . . .
C(22) Pd(5) Pd(6) C(20) 174.9(4) ? . . . .
C(22) Pd(5) Pd(6) C(26) 2.5(4) ? . . . .
C(22) Pd(5) Pd(6) C(27) -28.2(4) ? . . . .
Pd(6) Pd(5) C(28) C(22) -125.4(6) ? . . . .
Pd(6) Pd(5) C(28) C(27) -1.9(7) ? . . . .
C(28) Pd(5) Pd(6) Pd(4) 103.3(3) ? . . . .
C(28) Pd(5) Pd(6) N(4) -83.8(5) ? . . . .
C(28) Pd(5) Pd(6) C(19) 170.9(4) ? . . . .
C(28) Pd(5) Pd(6) C(20) -155.7(4) ? . . . .
C(28) Pd(5) Pd(6) C(26) 32.0(4) ? . . . .
C(28) Pd(5) Pd(6) C(27) 1.2(4) ? . . . .
N(3) Pd(5) C(15) C(16) -115.9(6) ? . . . .
N(3) Pd(5) C(15) C(21) 114.4(6) ? . . . .
C(15) Pd(5) N(3) C(33) 50(2) ? . . . .
N(3) Pd(5) C(21) C(15) -68.9(6) ? . . . .
N(3) Pd(5) C(21) C(20) 167.1(7) ? . . . .
C(21) Pd(5) N(3) C(33) 83(3) ? . . . .
N(3) Pd(5) C(22) C(23) 126.0(6) ? . . . .
N(3) Pd(5) C(22) C(28) -107.1(6) ? . . . .
C(22) Pd(5) N(3) C(33) -103(2) ? . . . .
N(3) Pd(5) C(28) C(22) 77.2(6) ? . . . .
N(3) Pd(5) C(28) C(27) -159.2(8) ? . . . .
C(28) Pd(5) N(3) C(33) -139(2) ? . . . .
C(15) Pd(5) C(21) C(20) -124.0(10) ? . . . .
C(21) Pd(5) C(15) C(16) 129.7(8) ? . . . .
C(15) Pd(5) C(22) C(23) 36.5(10) ? . . . .
C(15) Pd(5) C(22) C(28) 163.3(6) ? . . . .
C(22) Pd(5) C(15) C(16) -25.5(10) ? . . . .
C(22) Pd(5) C(15) C(21) -155.2(7) ? . . . .
C(15) Pd(5) C(28) C(22) -146.5(17) ? . . . .
C(15) Pd(5) C(28) C(27) -23(2) ? . . . .
C(28) Pd(5) C(15) C(16) 106.7(19) ? . . . .
C(28) Pd(5) C(15) C(21) -23(2) ? . . . .
C(21) Pd(5) C(22) C(23) -78.6(17) ? . . . .
C(21) Pd(5) C(22) C(28) 48.2(17) ? . . . .
C(22) Pd(5) C(21) C(15) 136.4(14) ? . . . .
C(22) Pd(5) C(21) C(20) 12(2) ? . . . .
C(21) Pd(5) C(28) C(22) -164.3(5) ? . . . .
C(21) Pd(5) C(28) C(27) -40.7(10) ? . . . .
C(28) Pd(5) C(21) C(15) 173.0(5) ? . . . .
C(28) Pd(5) C(21) C(20) 49.0(9) ? . . . .
C(22) Pd(5) C(28) C(27) 123.6(11) ? . . . .
C(28) Pd(5) C(22) C(23) -126.8(8) ? . . . .
Pd(4) Pd(6) N(4) C(35) 77(4) ? . . . .
Pd(4) Pd(6) C(19) C(18) -5.6(5) ? . . . .
Pd(4) Pd(6) C(19) C(20) 120.7(5) ? . . . .
Pd(4) Pd(6) C(20) C(19) -55.6(5) ? . . . .
Pd(4) Pd(6) C(20) C(21) 70.5(7) ? . . . .
Pd(4) Pd(6) C(26) C(25) 12.4(5) ? . . . .
Pd(4) Pd(6) C(26) C(27) -114.5(5) ? . . . .
Pd(4) Pd(6) C(27) C(26) 63.0(5) ? . . . .
Pd(4) Pd(6) C(27) C(28) -62.7(7) ? . . . .
Pd(5) Pd(6) N(4) C(35) -92(4) ? . . . .
Pd(5) Pd(6) C(19) C(18) -64.9(5) ? . . . .
Pd(5) Pd(6) C(19) C(20) 61.3(5) ? . . . .
Pd(5) Pd(6) C(20) C(19) -116.7(5) ? . . . .
Pd(5) Pd(6) C(20) C(21) 9.3(7) ? . . . .
Pd(5) Pd(6) C(26) C(25) 72.1(5) ? . . . .
Pd(5) Pd(6) C(26) C(27) -54.7(5) ? . . . .
Pd(5) Pd(6) C(27) C(26) 123.8(6) ? . . . .
Pd(5) Pd(6) C(27) C(28) -1.9(7) ? . . . .
N(4) Pd(6) C(19) C(18) 143.1(6) ? . . . .
N(4) Pd(6) C(19) C(20) -90.6(5) ? . . . .
C(19) Pd(6) N(4) C(35) 14(4) ? . . . .
N(4) Pd(6) C(20) C(19) 90.9(5) ? . . . .
N(4) Pd(6) C(20) C(21) -143.1(7) ? . . . .
C(20) Pd(6) N(4) C(35) -23(4) ? . . . .
N(4) Pd(6) C(26) C(25) -134.0(6) ? . . . .
N(4) Pd(6) C(26) C(27) 99.1(6) ? . . . .
C(26) Pd(6) N(4) C(35) 152(4) ? . . . .
N(4) Pd(6) C(27) C(26) -85.7(6) ? . . . .
N(4) Pd(6) C(27) C(28) 148.6(7) ? . . . .
C(27) Pd(6) N(4) C(35) -171(4) ? . . . .
C(19) Pd(6) C(20) C(21) 126.0(10) ? . . . .
C(20) Pd(6) C(19) C(18) -126.2(8) ? . . . .
C(19) Pd(6) C(26) C(25) -35.6(8) ? . . . .
C(19) Pd(6) C(26) C(27) -162.5(5) ? . . . .
C(26) Pd(6) C(19) C(18) 43.7(8) ? . . . .
C(26) Pd(6) C(19) C(20) 170.0(5) ? . . . .
C(19) Pd(6) C(27) C(26) 69.6(17) ? . . . .
C(19) Pd(6) C(27) C(28) -56(2) ? . . . .
C(27) Pd(6) C(19) C(18) -12.5(19) ? . . . .
C(27) Pd(6) C(19) C(20) 113.8(16) ? . . . .
C(20) Pd(6) C(26) C(25) 11(2) ? . . . .
C(20) Pd(6) C(26) C(27) -116(2) ? . . . .
C(26) Pd(6) C(20) C(19) -54(2) ? . . . .
C(26) Pd(6) C(20) C(21) 72(2) ? . . . .
C(20) Pd(6) C(27) C(26) 166.4(7) ? . . . .
C(20) Pd(6) C(27) C(28) 40.7(12) ? . . . .
C(27) Pd(6) C(20) C(19) -159.1(6) ? . . . .
C(27) Pd(6) C(20) C(21) -33.0(12) ? . . . .
C(26) Pd(6) C(27) C(28) -125.7(11) ? . . . .
C(27) Pd(6) C(26) C(25) 126.8(8) ? . . . .
Pd(1) N(1) C(29) C(30) -27(209) ? . . . .
Pd(2) N(2) C(31) C(32) 1(28) ? . . . .
Pd(5) N(3) C(33) C(34) 4(28) ? . . . .
Pd(6) N(4) C(35) C(36) -104(34) ? . . . .
Pd(1) C(1) C(2) Pd(2) -10.5(7) ? . . . .
Pd(1) C(1) C(2) C(3) -83.5(9) ? . . . .
Pd(1) C(1) C(7) C(6) 97.1(8) ? . . . .
C(2) C(1) C(7) Pd(1) -96.6(8) ? . . . .
C(2) C(1) C(7) C(6) 0.5(11) ? . . . .
C(7) C(1) C(2) Pd(2) 68.6(9) ? . . . .
C(7) C(1) C(2) C(3) -4.4(14) ? . . . .
Pd(2) C(2) C(3) C(4) -85.2(8) ? . . . .
C(1) C(2) C(3) Pd(2) 92.1(8) ? . . . .
C(1) C(2) C(3) C(4) 6.9(13) ? . . . .
Pd(2) C(3) C(4) C(5) -84.6(8) ? . . . .
C(2) C(3) C(4) C(5) -8.8(14) ? . . . .
C(3) C(4) C(5) Pd(3) 87.0(9) ? . . . .
C(3) C(4) C(5) C(6) 9.7(14) ? . . . .
Pd(3) C(5) C(6) C(7) -96.0(8) ? . . . .
C(4) C(5) C(6) Pd(3) 87.8(8) ? . . . .
C(4) C(5) C(6) C(7) -8.2(15) ? . . . .
Pd(3) C(6) C(7) Pd(1) 7.8(6) ? . . . .
Pd(3) C(6) C(7) C(1) -71.0(9) ? . . . .
C(5) C(6) C(7) Pd(1) 83.2(9) ? . . . .
C(5) C(6) C(7) C(1) 4.4(14) ? . . . .
Pd(1) C(8) C(9) Pd(2) -5.6(9) ? . . . .
Pd(1) C(8) C(9) C(10) 73.7(11) ? . . . .
Pd(1) C(8) C(14) C(13) -89.2(8) ? . . . .
C(9) C(8) C(14) Pd(1) 93.9(8) ? . . . .
C(9) C(8) C(14) C(13) 4.6(14) ? . . . .
C(14) C(8) C(9) Pd(2) -82.1(10) ? . . . .
C(14) C(8) C(9) C(10) -2.8(15) ? . . . .
Pd(2) C(9) C(10) C(11) 98.7(8) ? . . . .
C(8) C(9) C(10) Pd(2) -98.0(9) ? . . . .
C(8) C(9) C(10) C(11) 0.7(14) ? . . . .
Pd(2) C(10) C(11) Pd(3) 16.3(6) ? . . . .
Pd(2) C(10) C(11) C(12) 84.3(9) ? . . . .
C(9) C(10) C(11) Pd(3) -65.1(9) ? . . . .
C(9) C(10) C(11) C(12) 2.9(13) ? . . . .
Pd(3) C(11) C(12) C(13) 83.0(8) ? . . . .
C(10) C(11) C(12) Pd(3) -90.0(8) ? . . . .
C(10) C(11) C(12) C(13) -6.9(14) ? . . . .
Pd(3) C(12) C(13) C(14) 86.9(9) ? . . . .
C(11) C(12) C(13) C(14) 8.9(14) ? . . . .
C(12) C(13) C(14) Pd(1) -82.8(9) ? . . . .
C(12) C(13) C(14) C(8) -7.4(15) ? . . . .
Pd(5) C(15) C(16) C(17) -85.1(10) ? . . . .
Pd(5) C(15) C(21) C(20) 96.9(10) ? . . . .
C(16) C(15) C(21) Pd(5) -86.9(10) ? . . . .
C(16) C(15) C(21) C(20) 10.0(17) ? . . . .
C(21) C(15) C(16) C(17) -7.9(17) ? . . . .
C(15) C(16) C(17) Pd(4) 84.7(10) ? . . . .
C(15) C(16) C(17) C(18) 7.3(17) ? . . . .
Pd(4) C(17) C(18) C(19) -95.4(9) ? . . . .
C(16) C(17) C(18) Pd(4) 87.5(9) ? . . . .
C(16) C(17) C(18) C(19) -7.8(17) ? . . . .
Pd(4) C(18) C(19) Pd(6) 6.9(6) ? . . . .
Pd(4) C(18) C(19) C(20) -70.7(11) ? . . . .
C(17) C(18) C(19) Pd(6) 82.2(11) ? . . . .
C(17) C(18) C(19) C(20) 4.5(16) ? . . . .
Pd(6) C(19) C(20) C(21) -93.2(9) ? . . . .
C(18) C(19) C(20) Pd(6) 96.4(9) ? . . . .
C(18) C(19) C(20) C(21) 3.2(16) ? . . . .
Pd(6) C(20) C(21) Pd(5) -11.1(8) ? . . . .
Pd(6) C(20) C(21) C(15) -87.2(10) ? . . . .
C(19) C(20) C(21) Pd(5) 66.8(10) ? . . . .
C(19) C(20) C(21) C(15) -9.2(17) ? . . . .
Pd(5) C(22) C(23) C(24) 83.1(11) ? . . . .
Pd(5) C(22) C(28) C(27) -96.5(9) ? . . . .
C(23) C(22) C(28) Pd(5) 96.9(10) ? . . . .
C(23) C(22) C(28) C(27) 0.4(13) ? . . . .
C(28) C(22) C(23) C(24) 1.7(18) ? . . . .
C(22) C(23) C(24) Pd(4) -86.1(11) ? . . . .
C(22) C(23) C(24) C(25) -7.1(18) ? . . . .
Pd(4) C(24) C(25) C(26) 91.0(10) ? . . . .
C(23) C(24) C(25) Pd(4) -81.7(10) ? . . . .
C(23) C(24) C(25) C(26) 9.3(17) ? . . . .
Pd(4) C(25) C(26) Pd(6) -14.7(6) ? . . . .
Pd(4) C(25) C(26) C(27) 62.3(11) ? . . . .
C(24) C(25) C(26) Pd(6) -82.4(10) ? . . . .
C(24) C(25) C(26) C(27) -5.4(17) ? . . . .
Pd(6) C(26) C(27) C(28) 94.2(9) ? . . . .
C(25) C(26) C(27) Pd(6) -94.0(10) ? . . . .
C(25) C(26) C(27) C(28) 0.2(13) ? . . . .
Pd(6) C(27) C(28) Pd(5) 2.3(8) ? . . . .
Pd(6) C(27) C(28) C(22) 78.9(11) ? . . . .
C(26) C(27) C(28) Pd(5) -75.7(12) ? . . . .
C(26) C(27) C(28) C(22) 0.9(16) ? . . . .

loop_
_geom_contact_atom_site_label_1
_geom_contact_atom_site_label_2
_geom_contact_distance
_geom_contact_publ_flag
_geom_contact_site_symmetry_1
_geom_contact_site_symmetry_2
F(1) N(1) 3.451(11) ? . 1_565
F(1) C(29) 3.053(11) ? . 1_565
F(1) C(30) 3.119(12) ? . 1_565
F(1) C(34) 3.353(15) ? . .
F(1) C(38) 3.379(16) ? . 1_455
F(2) N(1) 3.385(12) ? . 2_565
F(2) C(8) 3.599(14) ? . 1_565
F(2) C(11) 3.488(13) ? . 2_665
F(2) C(18) 3.383(10) ? . 2_665
F(2) C(29) 3.044(12) ? . 2_565
F(2) C(30) 3.189(13) ? . 2_565
F(3) N(3) 3.527(10) ? . .
F(3) C(8) 3.485(11) ? . 1_565
F(3) C(10) 3.499(12) ? . 2_665
F(3) C(11) 3.367(11) ? . 2_665
F(3) C(14) 3.550(12) ? . 1_565
F(3) C(15) 3.325(10) ? . .
F(3) C(16) 3.521(11) ? . .
F(3) C(33) 3.165(10) ? . .
F(3) C(34) 3.235(11) ? . .
F(4) C(1) 3.281(14) ? . 2_565
F(4) C(2) 3.270(14) ? . 2_565
F(4) C(5) 3.556(12) ? . .
F(4) C(16) 3.247(11) ? . .
F(4) C(38) 3.502(15) ? . 1_455
F(5) C(26) 3.295(10) ? . .
F(5) C(30) 3.534(13) ? . 1_655
F(5) C(32) 3.268(12) ? . 1_556
F(5) C(32) 3.204(18) ? . 2_655
F(6) F(6) 3.550(12) ? . 2_756
F(6) N(4) 3.532(10) ? . .
F(6) C(34) 3.279(11) ? . 1_645
F(6) C(34) 3.315(14) ? . 2_666
F(6) C(35) 3.138(12) ? . .
F(6) C(36) 3.163(15) ? . .
F(6) C(36) 3.517(12) ? . 2_756
F(7) C(13) 3.351(11) ? . 2_656
F(7) C(32) 3.246(13) ? . 1_556
F(7) C(34) 3.447(16) ? . 2_666
F(7) C(36) 3.203(12) ? . 2_756
F(8) C(32) 3.340(18) ? . 2_655
F(8) C(36) 3.418(15) ? . 2_756
F(8) C(38) 3.213(15) ? . 1_545
N(1) F(1) 3.451(11) ? . 1_545
N(1) F(2) 3.385(12) ? . 2_565
N(1) C(35) 3.548(12) ? . 1_455
N(1) C(36) 3.553(15) ? . 1_455
N(2) C(21) 3.472(14) ? . 2_665
N(2) C(37) 3.513(14) ? . 2_665
N(3) F(3) 3.527(10) ? . .
N(3) N(4) 3.545(12) ? . 2_666
N(3) C(35) 3.593(12) ? . 2_666
N(4) F(6) 3.532(10) ? . .
N(4) N(3) 3.545(12) ? . 2_666
N(5) C(6) 3.388(13) ? . 1_655
N(5) C(20) 3.482(19) ? . .
N(5) C(22) 3.422(13) ? . 2_666
N(5) C(28) 3.368(14) ? . 2_666
C(1) F(4) 3.281(14) ? . 2_565
C(1) C(3) 3.571(11) ? . 2_565
C(1) C(4) 3.472(11) ? . 2_565
C(2) F(4) 3.270(14) ? . 2_565
C(2) C(4) 3.458(10) ? . 2_565
C(2) C(5) 3.492(12) ? . 2_565
C(3) C(1) 3.571(11) ? . 2_565
C(3) C(7) 3.598(11) ? . 2_565
C(3) C(20) 3.591(13) ? . 2_665
C(4) C(1) 3.472(11) ? . 2_565
C(4) C(2) 3.458(10) ? . 2_565
C(5) F(4) 3.556(12) ? . .
C(5) C(2) 3.492(12) ? . 2_565
C(6) N(5) 3.388(13) ? . 1_455
C(7) C(3) 3.598(11) ? . 2_565
C(8) F(2) 3.599(14) ? . 1_545
C(8) F(3) 3.485(11) ? . 1_545
C(8) C(10) 3.281(11) ? . 2_655
C(8) C(11) 3.475(11) ? . 2_655
C(9) C(9) 3.513(13) ? . 2_655
C(9) C(10) 3.336(11) ? . 2_655
C(9) C(11) 3.415(12) ? . 2_655
C(10) F(3) 3.499(12) ? . 2_665
C(10) C(8) 3.281(11) ? . 2_655
C(10) C(9) 3.336(11) ? . 2_655
C(10) C(14) 3.543(10) ? . 2_655
C(11) F(2) 3.488(13) ? . 2_665
C(11) F(3) 3.367(11) ? . 2_665
C(11) C(8) 3.475(11) ? . 2_655
C(11) C(9) 3.415(12) ? . 2_655
C(13) F(7) 3.351(11) ? . 2_656
C(14) F(3) 3.550(12) ? . 1_545
C(14) C(10) 3.543(10) ? . 2_655
C(15) F(3) 3.325(10) ? . .
C(16) F(3) 3.521(11) ? . .
C(16) F(4) 3.247(11) ? . .
C(16) C(17) 3.490(12) ? . 2_665
C(17) C(16) 3.490(12) ? . 2_665
C(17) C(17) 3.437(13) ? . 2_665
C(18) F(2) 3.383(10) ? . 2_665
C(20) N(5) 3.482(19) ? . .
C(20) C(3) 3.591(13) ? . 2_665
C(21) N(2) 3.472(14) ? . 2_665
C(22) N(5) 3.422(13) ? . 2_666
C(26) F(5) 3.295(10) ? . .
C(26) C(32) 3.501(15) ? . 1_556
C(28) N(5) 3.368(14) ? . 2_666
C(29) F(1) 3.053(11) ? . 1_545
C(29) F(2) 3.044(12) ? . 2_565
C(30) F(1) 3.119(12) ? . 1_545
C(30) F(2) 3.189(13) ? . 2_565
C(30) F(5) 3.534(13) ? . 1_455
C(32) F(5) 3.268(12) ? . 1_554
C(32) F(5) 3.204(18) ? . 2_655
C(32) F(7) 3.246(13) ? . 1_554
C(32) F(8) 3.340(18) ? . 2_655
C(32) C(26) 3.501(15) ? . 1_554
C(33) F(3) 3.165(10) ? . .
C(33) C(35) 3.548(12) ? . 2_666
C(34) F(1) 3.353(15) ? . .
C(34) F(3) 3.235(11) ? . .
C(34) F(6) 3.279(11) ? . 1_465
C(34) F(6) 3.315(14) ? . 2_666
C(34) F(7) 3.447(16) ? . 2_666
C(35) F(6) 3.138(12) ? . .
C(35) N(1) 3.548(12) ? . 1_655
C(35) N(3) 3.593(12) ? . 2_666
C(35) C(33) 3.548(12) ? . 2_666
C(36) F(6) 3.163(15) ? . .
C(36) F(6) 3.517(12) ? . 2_756
C(36) F(7) 3.203(12) ? . 2_756
C(36) F(8) 3.418(15) ? . 2_756
C(36) N(1) 3.553(15) ? . 1_655
C(36) B(2) 3.592(16) ? . 2_756
C(37) N(2) 3.513(14) ? . 2_665
C(38) F(1) 3.379(16) ? . 1_655
C(38) F(4) 3.502(15) ? . 1_655
C(38) F(8) 3.213(15) ? . 1_565
B(2) C(36) 3.592(16) ? . 2_756
Pd(1) H(39) 3.524(10) ? . 1_455
Pd(5) H(27) 3.098 ? . 2_666
Pd(6) H(28) 3.051 ? . 2_666
F(1) H(1) 3.583(13) ? . 2_565
F(1) H(2) 3.304(13) ? . 2_565
F(1) H(8) 3.353(13) ? . 1_565
F(1) H(29) 2.421(12) ? . 1_565
F(1) H(36) 2.573(14) ? . .
F(1) H(37) 3.447(16) ? . .
F(1) H(42) 2.764(16) ? . 1_455
F(1) H(43) 3.203(16) ? . 1_455
F(2) H(1) 2.957(14) ? . 2_565
F(2) H(8) 2.763(13) ? . 1_565
F(2) H(11) 2.764(12) ? . 2_665
F(2) H(18) 2.647 ? . 2_665
F(2) H(19) 3.383 ? . 2_665
F(2) H(31) 2.557(13) ? . 2_565
F(3) H(8) 3.020(11) ? . 1_565
F(3) H(10) 2.930(12) ? . 2_665
F(3) H(11) 2.696(10) ? . 2_665
F(3) H(14) 3.084(12) ? . 1_565
F(3) H(15) 2.538 ? . .
F(3) H(16) 2.957 ? . .
F(3) H(36) 3.031(11) ? . .
F(3) H(37) 3.018(12) ? . .
F(4) H(1) 2.643(13) ? . 2_565
F(4) H(2) 2.651(13) ? . 2_565
F(4) H(4) 3.506(11) ? . .
F(4) H(5) 2.961(11) ? . .
F(4) H(15) 3.577 ? . .
F(4) H(16) 2.311 ? . .
F(4) H(18) 3.344 ? . 2_665
F(4) H(42) 2.561(15) ? . 1_455
F(5) H(25) 3.210 ? . .
F(5) H(26) 2.451 ? . .
F(5) H(30) 2.586(13) ? . 1_655
F(5) H(32) 3.383(12) ? . 1_556
F(5) H(32) 2.673(17) ? . 2_655
F(5) H(33) 3.127(12) ? . 1_556
F(5) H(33) 2.864(17) ? . 2_655
F(5) H(34) 2.782(12) ? . 1_556
F(6) H(30) 3.063(16) ? . 1_655
F(6) H(35) 2.579(12) ? . 1_645
F(6) H(35) 2.558(15) ? . 2_666
F(6) H(36) 3.170(11) ? . 1_645
F(6) H(37) 3.394(13) ? . 2_666
F(6) H(38) 2.857(16) ? . .
F(6) H(38) 2.764(12) ? . 2_756
F(6) H(39) 3.033(14) ? . .
F(6) H(39) 3.475(13) ? . 2_756
F(7) H(13) 2.473(11) ? . 2_656
F(7) H(14) 3.437(12) ? . 2_656
F(7) H(24) 3.439 ? . 2_656
F(7) H(25) 3.166 ? . 2_656
F(7) H(32) 3.038(14) ? . 1_556
F(7) H(34) 2.619(13) ? . 1_556
F(7) H(35) 3.200(16) ? . 2_666
F(7) H(37) 2.895(16) ? . 2_666
F(7) H(38) 2.963(12) ? . 2_756
F(7) H(39) 2.936(13) ? . 2_756
F(7) H(40) 3.174(12) ? . 2_756
F(8) H(30) 3.088(14) ? . 1_655
F(8) H(32) 3.345(17) ? . 2_655
F(8) H(33) 2.648(18) ? . 2_655
F(8) H(35) 3.302(16) ? . 1_645
F(8) H(36) 3.223(13) ? . 1_645
F(8) H(38) 2.773(15) ? . 2_756
F(8) H(40) 3.280(14) ? . 2_756
F(8) H(41) 3.109(14) ? . 1_545
F(8) H(43) 2.512(15) ? . 1_545
N(1) H(19) 3.198 ? . 1_455
N(1) H(36) 3.553(12) ? . 1_545
N(1) H(37) 3.556(13) ? . 1_545
N(1) H(39) 2.826(15) ? . 1_455
N(2) H(15) 3.552 ? . 2_665
N(2) H(21) 2.880 ? . 2_665
N(2) H(43) 3.18(2) ? . 2_665
N(3) H(27) 3.004 ? . 2_666
N(3) H(41) 3.09(2) ? . 1_455
N(4) H(7) 3.239(12) ? . 1_655
N(4) H(28) 3.080 ? . 2_666
N(5) H(3) 3.038(15) ? . 2_665
N(5) H(6) 2.926(13) ? . 1_655
N(5) H(7) 3.542(15) ? . 1_655
N(5) H(20) 2.654 ? . .
N(5) H(21) 3.334 ? . .
N(5) H(22) 3.443 ? . 2_666
N(5) H(23) 3.070 ? . 1_655
N(5) H(28) 3.355 ? . 2_666
C(1) H(3) 3.577(11) ? . 2_565
C(1) H(4) 3.539(11) ? . 2_565
C(1) H(19) 3.241 ? . 1_455
C(2) H(42) 3.46(2) ? . 2_665
C(3) H(20) 3.558 ? . 2_665
C(5) H(2) 3.415(11) ? . 2_565
C(6) H(3) 3.454(12) ? . 2_565
C(7) H(3) 3.300(11) ? . 2_565
C(7) H(19) 3.220 ? . 1_455
C(7) H(20) 3.203 ? . 1_455
C(8) H(10) 3.303(11) ? . 2_655
C(11) H(8) 3.484(11) ? . 2_655
C(11) H(9) 3.338(12) ? . 2_655
C(12) H(9) 3.244(11) ? . 2_655
C(12) H(31) 3.395(16) ? . 1_655
C(13) H(9) 3.559(11) ? . 2_655
C(13) H(32) 3.567(15) ? . 2_655
C(14) H(10) 3.251(10) ? . 2_655
C(14) H(37) 3.038(14) ? . 1_545
C(15) H(4) 3.183(12) ? . 2_665
C(16) H(4) 3.340(14) ? . 2_665
C(16) H(17) 3.040 ? . 2_665
C(17) H(4) 3.339(15) ? . 2_665
C(17) H(16) 3.355 ? . 2_665
C(17) H(17) 3.180 ? . 2_665
C(18) H(4) 3.287(14) ? . 2_665
C(19) H(1) 3.143(11) ? . 1_655
C(19) H(4) 3.098(13) ? . 2_665
C(19) H(7) 3.219(14) ? . 1_655
C(20) H(3) 2.864(14) ? . 2_665
C(20) H(4) 2.999(13) ? . 2_665
C(20) H(7) 3.257(12) ? . 1_655
C(20) H(28) 3.578 ? . 2_666
C(21) H(3) 2.988(14) ? . 2_665
C(21) H(4) 3.114(13) ? . 2_665
C(21) H(27) 3.567 ? . 2_666
C(22) H(41) 3.546(16) ? . 1_455
C(24) H(40) 3.241(18) ? . 1_455
C(25) H(33) 3.253(14) ? . 1_556
C(26) H(33) 2.875(15) ? . 1_556
C(26) H(34) 3.301(15) ? . 1_556
C(27) H(21) 3.349 ? . 2_666
C(27) H(28) 3.062 ? . 2_666
C(27) H(33) 3.506(17) ? . 1_556
C(28) H(21) 3.563 ? . 2_666
C(28) H(27) 3.174 ? . 2_666
C(28) H(28) 3.404 ? . 2_666
C(29) H(19) 3.189 ? . 1_455
C(29) H(36) 3.311(13) ? . 1_545
C(29) H(39) 3.307(18) ? . 1_455
C(30) H(9) 3.368(19) ? . 2_555
C(30) H(32) 3.550(19) ? . 2_555
C(30) H(36) 3.555(16) ? . 1_545
C(31) H(21) 3.180 ? . 2_665
C(31) H(29) 3.588(18) ? . 2_555
C(31) H(43) 3.19(2) ? . 2_665
C(32) H(26) 3.167 ? . 1_554
C(33) H(38) 3.143(13) ? . 2_666
C(33) H(41) 2.92(2) ? . 1_455
C(33) H(42) 3.58(2) ? . 1_455
C(34) H(14) 3.013(14) ? . 1_565
C(34) H(38) 2.972(14) ? . 2_666
C(34) H(39) 3.341(15) ? . 1_465
C(34) H(41) 3.30(2) ? . 1_455
C(35) H(7) 2.976(12) ? . 1_655
C(35) H(35) 3.471(14) ? . 2_666
C(36) H(7) 3.247(14) ? . 1_655
C(36) H(24) 3.417 ? . 1_655
C(36) H(35) 3.114(15) ? . 2_666
C(37) H(2) 3.296(14) ? . 2_665
C(37) H(3) 3.253(16) ? . 2_665
C(37) H(6) 3.255(14) ? . 1_655
C(37) H(23) 3.010 ? . 1_655
C(38) H(2) 3.164(18) ? . 2_665
C(38) H(22) 3.532 ? . 1_655
C(38) H(23) 3.482 ? . 1_655
C(38) H(36) 3.16(2) ? . 1_655
B(1) H(1) 3.195(18) ? . 2_565
B(1) H(2) 3.458(17) ? . 2_565
B(1) H(8) 3.206(16) ? . 1_565
B(1) H(11) 3.230(15) ? . 2_665
B(1) H(16) 3.168 ? . .
B(1) H(18) 3.416 ? . 2_665
B(1) H(36) 3.319(15) ? . .
B(1) H(42) 3.111(19) ? . 1_455
B(2) H(26) 3.551 ? . .
B(2) H(30) 3.044(17) ? . 1_655
B(2) H(32) 3.55(2) ? . 2_655
B(2) H(33) 3.21(2) ? . 2_655
B(2) H(34) 3.207(15) ? . 1_556
B(2) H(35) 3.488(16) ? . 1_645
B(2) H(35) 3.43(2) ? . 2_666
B(2) H(38) 2.990(16) ? . 2_756
B(2) H(39) 3.593(17) ? . 2_756
H(1) F(1) 3.583(13) ? . 2_565
H(1) F(2) 2.957(14) ? . 2_565
H(1) F(4) 2.643(13) ? . 2_565
H(1) C(19) 3.143(11) ? . 1_455
H(1) B(1) 3.195(18) ? . 2_565
H(1) H(4) 3.467(10) ? . 2_565
H(1) H(19) 2.642 ? . 1_455
H(2) F(1) 3.304(13) ? . 2_565
H(2) F(4) 2.651(13) ? . 2_565
H(2) C(5) 3.415(11) ? . 2_565
H(2) C(37) 3.296(14) ? . 2_665
H(2) C(38) 3.164(18) ? . 2_665
H(2) B(1) 3.458(17) ? . 2_565
H(2) H(5) 3.433(12) ? . 2_565
H(2) H(42) 2.533(19) ? . 2_665
H(2) H(43) 3.315(17) ? . 2_665
H(3) N(5) 3.038(15) ? . 2_665
H(3) C(1) 3.577(11) ? . 2_565
H(3) C(6) 3.454(12) ? . 2_565
H(3) C(7) 3.300(11) ? . 2_565
H(3) C(20) 2.864(14) ? . 2_665
H(3) C(21) 2.988(14) ? . 2_665
H(3) C(37) 3.253(16) ? . 2_665
H(3) H(7) 3.558(11) ? . 2_565
H(3) H(20) 2.717 ? . 2_665
H(3) H(21) 3.048 ? . 2_665
H(4) F(4) 3.506(11) ? . .
H(4) C(1) 3.539(11) ? . 2_565
H(4) C(15) 3.183(12) ? . 2_665
H(4) C(16) 3.340(14) ? . 2_665
H(4) C(17) 3.339(15) ? . 2_665
H(4) C(18) 3.287(14) ? . 2_665
H(4) C(19) 3.098(13) ? . 2_665
H(4) C(20) 2.999(13) ? . 2_665
H(4) C(21) 3.114(13) ? . 2_665
H(4) H(1) 3.467(10) ? . 2_565
H(4) H(20) 3.456 ? . 2_665
H(5) F(4) 2.961(11) ? . .
H(5) H(2) 3.433(12) ? . 2_565
H(5) H(42) 3.376(15) ? . 1_455
H(6) N(5) 2.926(13) ? . 1_455
H(6) C(37) 3.255(14) ? . 1_455
H(6) H(40) 3.121(14) ? . 1_455
H(7) N(4) 3.239(12) ? . 1_455
H(7) N(5) 3.542(15) ? . 1_455
H(7) C(19) 3.219(14) ? . 1_455
H(7) C(20) 3.257(12) ? . 1_455
H(7) C(35) 2.976(12) ? . 1_455
H(7) C(36) 3.247(14) ? . 1_455
H(7) H(3) 3.558(11) ? . 2_565
H(7) H(19) 2.616 ? . 1_455
H(7) H(20) 2.672 ? . 1_455
H(7) H(39) 3.172(14) ? . 1_455
H(7) H(40) 3.026(14) ? . 1_455
H(8) F(1) 3.353(13) ? . 1_545
H(8) F(2) 2.763(13) ? . 1_545
H(8) F(3) 3.020(11) ? . 1_545
H(8) C(11) 3.484(11) ? . 2_655
H(8) B(1) 3.206(16) ? . 1_545
H(8) H(10) 3.583(13) ? . 2_655
H(8) H(11) 3.414(11) ? . 2_655
H(8) H(29) 3.487(18) ? . 2_555
H(8) H(31) 3.141(18) ? . 2_555
H(9) C(11) 3.338(12) ? . 2_655
H(9) C(12) 3.244(11) ? . 2_655
H(9) C(13) 3.559(11) ? . 2_655
H(9) C(30) 3.368(19) ? . 2_555
H(9) H(12) 3.512(12) ? . 2_655
H(9) H(29) 3.045(19) ? . 2_555
H(9) H(31) 2.858(19) ? . 2_555
H(10) F(3) 2.930(12) ? . 2_665
H(10) C(8) 3.303(11) ? . 2_655
H(10) C(14) 3.251(10) ? . 2_655
H(10) H(8) 3.583(13) ? . 2_655
H(10) H(14) 3.439(11) ? . 2_655
H(10) H(15) 3.045 ? . 2_665
H(11) F(2) 2.764(12) ? . 2_665
H(11) F(3) 2.696(10) ? . 2_665
H(11) B(1) 3.230(15) ? . 2_665
H(11) H(8) 3.414(11) ? . 2_655
H(11) H(15) 3.517 ? . 2_665
H(11) H(31) 3.469(16) ? . 1_655
H(12) H(9) 3.512(12) ? . 2_655
H(12) H(31) 2.885(14) ? . 1_655
H(12) H(32) 3.564(14) ? . 2_655
H(13) F(7) 2.473(11) ? . 2_656
H(13) H(32) 3.150(15) ? . 2_655
H(13) H(34) 3.512(14) ? . 2_655
H(13) H(37) 3.429(17) ? . 1_545
H(13) H(39) 3.284(14) ? . 1_455
H(13) H(40) 3.431(12) ? . 1_455
H(14) F(3) 3.084(12) ? . 1_545
H(14) F(7) 3.437(12) ? . 2_656
H(14) C(34) 3.013(14) ? . 1_545
H(14) H(10) 3.439(11) ? . 2_655
H(14) H(35) 3.561(14) ? . 1_545
H(14) H(36) 3.183(15) ? . 1_545
H(14) H(37) 2.130(14) ? . 1_545
H(14) H(39) 3.050(12) ? . 1_455
H(15) F(3) 2.538 ? . .
H(15) F(4) 3.577 ? . .
H(15) N(2) 3.552 ? . 2_665
H(15) H(10) 3.045 ? . 2_665
H(15) H(11) 3.517 ? . 2_665
H(16) F(3) 2.957 ? . .
H(16) F(4) 2.311 ? . .
H(16) C(17) 3.355 ? . 2_665
H(16) B(1) 3.168 ? . .
H(16) H(17) 3.068 ? . 2_665
H(17) C(16) 3.040 ? . 2_665
H(17) C(17) 3.180 ? . 2_665
H(17) H(16) 3.068 ? . 2_665
H(17) H(17) 3.197 ? . 2_665
H(18) F(2) 2.647 ? . 2_665
H(18) F(4) 3.344 ? . 2_665
H(18) B(1) 3.416 ? . 2_665
H(18) H(31) 3.195 ? . 1_655
H(19) F(2) 3.383 ? . 2_665
H(19) N(1) 3.198 ? . 1_655
H(19) C(1) 3.241 ? . 1_655
H(19) C(7) 3.220 ? . 1_655
H(19) C(29) 3.189 ? . 1_655
H(19) H(1) 2.642 ? . 1_655
H(19) H(7) 2.616 ? . 1_655
H(19) H(31) 3.495 ? . 1_655
H(20) N(5) 2.654 ? . .
H(20) C(3) 3.558 ? . 2_665
H(20) C(7) 3.203 ? . 1_655
H(20) H(3) 2.717 ? . 2_665
H(20) H(4) 3.456 ? . 2_665
H(20) H(7) 2.672 ? . 1_655
H(20) H(28) 3.148 ? . 2_666
H(21) N(2) 2.880 ? . 2_665
H(21) N(5) 3.334 ? . .
H(21) C(27) 3.349 ? . 2_666
H(21) C(28) 3.563 ? . 2_666
H(21) C(31) 3.180 ? . 2_665
H(21) H(3) 3.048 ? . 2_665
H(21) H(27) 2.871 ? . 2_666
H(21) H(28) 3.259 ? . 2_666
H(22) N(5) 3.443 ? . 2_666
H(22) C(38) 3.532 ? . 1_455
H(22) H(41) 2.749 ? . 1_455
H(23) N(5) 3.070 ? . 1_455
H(23) C(37) 3.010 ? . 1_455
H(23) C(38) 3.482 ? . 1_455
H(23) H(40) 3.467 ? . 1_455
H(23) H(41) 3.232 ? . 1_455
H(23) H(42) 3.559 ? . 1_455
H(24) F(7) 3.439 ? . 2_656
H(24) C(36) 3.417 ? . 1_455
H(24) H(39) 3.557 ? . 1_455
H(24) H(40) 2.551 ? . 1_455
H(25) F(5) 3.210 ? . .
H(25) F(7) 3.166 ? . 2_656
H(25) H(32) 3.101 ? . 2_655
H(25) H(33) 3.385 ? . 1_556
H(26) F(5) 2.451 ? . .
H(26) C(32) 3.167 ? . 1_556
H(26) B(2) 3.551 ? . .
H(26) H(33) 2.702 ? . 1_556
H(26) H(34) 2.768 ? . 1_556
H(27) Pd(5) 3.098 ? . 2_666
H(27) N(3) 3.004 ? . 2_666
H(27) C(21) 3.567 ? . 2_666
H(27) C(28) 3.174 ? . 2_666
H(27) H(21) 2.871 ? . 2_666
H(27) H(28) 2.431 ? . 2_666
H(27) H(34) 3.549 ? . 1_556
H(28) Pd(6) 3.051 ? . 2_666
H(28) N(4) 3.080 ? . 2_666
H(28) N(5) 3.355 ? . 2_666
H(28) C(20) 3.578 ? . 2_666
H(28) C(27) 3.062 ? . 2_666
H(28) C(28) 3.404 ? . 2_666
H(28) H(20) 3.148 ? . 2_666
H(28) H(21) 3.259 ? . 2_666
H(28) H(27) 2.431 ? . 2_666
H(28) H(28) 3.061 ? . 2_666
H(29) F(1) 2.421(12) ? . 1_545
H(29) C(31) 3.588(18) ? . 2_555
H(29) H(8) 3.487(18) ? . 2_555
H(29) H(9) 3.045(19) ? . 2_555
H(29) H(32) 3.580(17) ? . 2_555
H(29) H(36) 3.234(18) ? . 1_545
H(29) H(43) 3.060(18) ? . 1_445
H(30) F(5) 2.586(13) ? . 1_455
H(30) F(6) 3.063(16) ? . 1_455
H(30) F(8) 3.088(14) ? . 1_455
H(30) B(2) 3.044(17) ? . 1_455
H(30) H(32) 2.99(2) ? . 2_555
H(30) H(36) 3.541(16) ? . 1_545
H(31) F(2) 2.557(13) ? . 2_565
H(31) C(12) 3.395(16) ? . 1_455
H(31) H(8) 3.141(18) ? . 2_555
H(31) H(9) 2.858(19) ? . 2_555
H(31) H(11) 3.469(16) ? . 1_455
H(31) H(12) 2.885(14) ? . 1_455
H(31) H(18) 3.195 ? . 1_455
H(31) H(19) 3.495 ? . 1_455
H(31) H(32) 3.546(18) ? . 2_555
H(32) F(5) 3.383(12) ? . 1_554
H(32) F(5) 2.673(17) ? . 2_655
H(32) F(7) 3.038(14) ? . 1_554
H(32) F(8) 3.345(17) ? . 2_655
H(32) C(13) 3.567(15) ? . 2_655
H(32) C(30) 3.550(19) ? . 2_555
H(32) B(2) 3.55(2) ? . 2_655
H(32) H(12) 3.564(14) ? . 2_655
H(32) H(13) 3.150(15) ? . 2_655
H(32) H(25) 3.101 ? . 2_655
H(32) H(29) 3.580(17) ? . 2_555
H(32) H(30) 2.99(2) ? . 2_555
H(32) H(31) 3.546(18) ? . 2_555
H(33) F(5) 3.127(12) ? . 1_554
H(33) F(5) 2.864(17) ? . 2_655
H(33) F(8) 2.648(18) ? . 2_655
H(33) C(25) 3.253(14) ? . 1_554
H(33) C(26) 2.875(15) ? . 1_554
H(33) C(27) 3.506(17) ? . 1_554
H(33) B(2) 3.21(2) ? . 2_655
H(33) H(25) 3.385 ? . 1_554
H(33) H(26) 2.702 ? . 1_554
H(33) H(43) 3.415(18) ? . 2_665
H(34) F(5) 2.782(12) ? . 1_554
H(34) F(7) 2.619(13) ? . 1_554
H(34) C(26) 3.301(15) ? . 1_554
H(34) B(2) 3.207(15) ? . 1_554
H(34) H(13) 3.512(14) ? . 2_655
H(34) H(26) 2.768 ? . 1_554
H(34) H(27) 3.549 ? . 1_554
H(34) H(37) 3.50(2) ? . 2_665
H(35) F(6) 2.579(12) ? . 1_465
H(35) F(6) 2.558(15) ? . 2_666
H(35) F(7) 3.200(16) ? . 2_666
H(35) F(8) 3.302(16) ? . 1_465
H(35) C(35) 3.471(14) ? . 2_666
H(35) C(36) 3.114(15) ? . 2_666
H(35) B(2) 3.488(16) ? . 1_465
H(35) B(2) 3.43(2) ? . 2_666
H(35) H(14) 3.561(14) ? . 1_565
H(35) H(38) 3.371(16) ? . 1_465
H(35) H(38) 2.241(15) ? . 2_666
H(35) H(39) 3.037(15) ? . 1_465
H(35) H(39) 3.555(14) ? . 2_666
H(35) H(41) 3.58(2) ? . 1_455
H(36) F(1) 2.573(14) ? . .
H(36) F(3) 3.031(11) ? . .
H(36) F(6) 3.170(11) ? . 1_465
H(36) F(8) 3.223(13) ? . 1_465
H(36) N(1) 3.553(12) ? . 1_565
H(36) C(29) 3.311(13) ? . 1_565
H(36) C(30) 3.555(16) ? . 1_565
H(36) C(38) 3.16(2) ? . 1_455
H(36) B(1) 3.319(15) ? . .
H(36) H(14) 3.183(15) ? . 1_565
H(36) H(29) 3.234(18) ? . 1_565
H(36) H(30) 3.541(16) ? . 1_565
H(36) H(38) 3.283(15) ? . 2_666
H(36) H(39) 3.553(17) ? . 1_465
H(36) H(41) 2.871(19) ? . 1_455
H(36) H(42) 3.13(2) ? . 1_455
H(36) H(43) 2.93(2) ? . 1_455
H(37) F(1) 3.447(16) ? . .
H(37) F(3) 3.018(12) ? . .
H(37) F(6) 3.394(13) ? . 2_666
H(37) F(7) 2.895(16) ? . 2_666
H(37) N(1) 3.556(13) ? . 1_565
H(37) C(14) 3.038(14) ? . 1_565
H(37) H(13) 3.429(17) ? . 1_565
H(37) H(14) 2.130(14) ? . 1_565
H(37) H(34) 3.50(2) ? . 2_665
H(37) H(39) 2.929(14) ? . 1_465
H(38) F(6) 2.857(16) ? . .
H(38) F(6) 2.764(12) ? . 2_756
H(38) F(7) 2.963(12) ? . 2_756
H(38) F(8) 2.773(15) ? . 2_756
H(38) C(33) 3.143(13) ? . 2_666
H(38) C(34) 2.972(14) ? . 2_666
H(38) B(2) 2.990(16) ? . 2_756
H(38) H(35) 3.371(16) ? . 1_645
H(38) H(35) 2.241(15) ? . 2_666
H(38) H(36) 3.283(15) ? . 2_666
H(38) H(41) 3.53(2) ? . 2_766
H(39) Pd(1) 3.524(10) ? . 1_655
H(39) F(6) 3.033(14) ? . .
H(39) F(6) 3.475(13) ? . 2_756
H(39) F(7) 2.936(13) ? . 2_756
H(39) N(1) 2.826(15) ? . 1_655
H(39) C(29) 3.307(18) ? . 1_655
H(39) C(34) 3.341(15) ? . 1_645
H(39) B(2) 3.593(17) ? . 2_756
H(39) H(7) 3.172(14) ? . 1_655
H(39) H(13) 3.284(14) ? . 1_655
H(39) H(14) 3.050(12) ? . 1_655
H(39) H(24) 3.557 ? . 1_655
H(39) H(35) 3.037(15) ? . 1_645
H(39) H(35) 3.555(14) ? . 2_666
H(39) H(36) 3.553(17) ? . 1_645
H(39) H(37) 2.929(14) ? . 1_645
H(40) F(7) 3.174(12) ? . 2_756
H(40) F(8) 3.280(14) ? . 2_756
H(40) C(24) 3.241(18) ? . 1_655
H(40) H(6) 3.121(14) ? . 1_655
H(40) H(7) 3.026(14) ? . 1_655
H(40) H(13) 3.431(12) ? . 1_655
H(40) H(23) 3.467 ? . 1_655
H(40) H(24) 2.551 ? . 1_655
H(41) F(8) 3.109(14) ? . 1_565
H(41) N(3) 3.09(2) ? . 1_655
H(41) C(22) 3.546(16) ? . 1_655
H(41) C(33) 2.92(2) ? . 1_655
H(41) C(34) 3.30(2) ? . 1_655
H(41) H(22) 2.749 ? . 1_655
H(41) H(23) 3.232 ? . 1_655
H(41) H(35) 3.58(2) ? . 1_655
H(41) H(36) 2.871(19) ? . 1_655
H(41) H(38) 3.53(2) ? . 2_766
H(42) F(1) 2.764(16) ? . 1_655
H(42) F(4) 2.561(15) ? . 1_655
H(42) C(2) 3.46(2) ? . 2_665
H(42) C(33) 3.58(2) ? . 1_655
H(42) B(1) 3.111(19) ? . 1_655
H(42) H(2) 2.533(19) ? . 2_665
H(42) H(5) 3.376(15) ? . 1_655
H(42) H(23) 3.559 ? . 1_655
H(42) H(36) 3.13(2) ? . 1_655
H(43) F(1) 3.203(16) ? . 1_655
H(43) F(8) 2.512(15) ? . 1_565
H(43) N(2) 3.18(2) ? . 2_665
H(43) C(31) 3.19(2) ? . 2_665
H(43) H(2) 3.315(17) ? . 2_665
H(43) H(29) 3.060(18) ? . 1_665
H(43) H(33) 3.415(18) ? . 2_665
H(43) H(36) 2.93(2) ? . 1_655


#==============================================================================

# Additional structures and associated data_? identifiers
# should be added at this point if there is more than one 
# structure analysis in the CIF.

#==============================================================================

#     End of CIF

#==============================================================================
